# Supplementary material for: Grubbs–Hoveyda type catalysts bearing a dicationic N-heterocyclic carbene for biphasic olefin metathesis reactions in ionic liquids
Source: publisher site journal article supplement (doi:10.3762/bjoc.11.178), 2015-09-15
Supplement: Additional file 1 [file 1860-5397-11-178-S1.pdf]

# Supporting Information

for

## Grubbs–Hoveyda type catalysts bearing a dicationic *N*-heterocyclic carbene for biphasic olefin metathesis reactions in ionic liquids

Maximilian Koy<sup>1</sup>, Hagen J. Altmann<sup>1</sup>, Benjamin Autenrieth<sup>1</sup>, Wolfgang Frey<sup>2</sup> and Michael R.  
Buchmeiser<sup>1,3\*</sup>

Address: <sup>1</sup>Lehrstuhl für Makromolekulare Stoffe und Faserchemie, Institut für Polymerchemie, Universität Stuttgart, Pfaffenwaldring 55, D-70569 Stuttgart, Germany, Fax: +49 (0)711-685-64050, <sup>2</sup>Institut für Organische Chemie, Universität Stuttgart, Pfaffenwaldring 55, D-70569 Stuttgart, Germany and <sup>3</sup>Institut für Textilchemie und Chemiefaser (ITCF) Denkendorf, Körschtalstr. 26, D-73770 Denkendorf, Germany

Email: Michael Buchmeiser - [michael.buchmeiser@ipoc.uni-stuttgart.de](mailto:michael.buchmeiser@ipoc.uni-stuttgart.de)

\*Corresponding author

## Analytical data for Ru-2, the polymers prepared, details on the single crystal X-ray structural analysis of Ru-2, results for biphasic RCM

### Table of Contents

|                                                                           |     |
|---------------------------------------------------------------------------|-----|
| 1. Ring-closing metathesis (RCM) reactions under biphasic conditions..... | S3  |
| 1.1. General RCM procedure .....                                          | S3  |
| 1.2. Results .....                                                        | S3  |
| 2. References.....                                                        | S3  |
| 3. Analytical data for <b>Ru-2</b> .....                                  | S5  |
| 4. Analytical data for polymers prepared by <b>Ru-2</b> .....             | S8  |
| 5. X-ray crystallography data for <b>Ru-2</b> .....                       | S18 |

## List of Figures

|                                                                                                                                    |     |
|------------------------------------------------------------------------------------------------------------------------------------|-----|
| Figure S1: $^1\text{H}$ NMR of <b>Ru-2</b> in $\text{DMF-}d_7$ . .....                                                             | S5  |
| Figure S2: $^{13}\text{C}$ NMR of <b>Ru-2</b> in $\text{DMF-}d_7$ . .....                                                          | S6  |
| Figure S3: $^{19}\text{F}$ NMR of <b>Ru-2</b> in $\text{DMF-}d_7$ . .....                                                          | S7  |
| Figure S4: $^1\text{H}$ NMR of poly- <b>M1</b> in $\text{CDCl}_3$ . .....                                                          | S8  |
| Figure S5: $^{13}\text{C}$ NMR of poly- <b>M1</b> in $\text{CDCl}_3$ . .....                                                       | S9  |
| Figure S6: $^1\text{H}$ NMR of poly- <b>M2</b> in $\text{CDCl}_3$ . .....                                                          | S10 |
| Figure S7: $^{13}\text{C}$ NMR of poly- <b>M2</b> in $\text{CDCl}_3$ . .....                                                       | S11 |
| Figure S8: $^1\text{H}$ NMR of poly- <b>M3</b> in $\text{CDCl}_3$ . .....                                                          | S12 |
| Figure S9: $^{13}\text{C}$ NMR of poly- <b>M3</b> in $\text{CDCl}_3$ . .....                                                       | S13 |
| Figure S10: $^1\text{H}$ NMR of poly- <b>M4</b> in $\text{CDCl}_3$ . .....                                                         | S14 |
| Figure S11: $^{13}\text{C}$ NMR of poly- <b>M4</b> in $\text{CDCl}_3$ . .....                                                      | S15 |
| Figure S12: $^1\text{H}$ NMR of poly- <b>M6</b> in $\text{CDCl}_3$ . .....                                                         | S16 |
| Figure S13: $^{13}\text{C}$ NMR of poly- <b>M6</b> in $\text{CDCl}_3$ . .....                                                      | S17 |
| Figure S14: Single crystal X-ray structure of <b>Ru-2</b> . Cosolvent and disordered triflates have been omitted for clarity. .... | S18 |
| Figure S15: Single crystal X-ray structure of <b>Ru-2</b> with DMF in the crystal lattice and disordered triflates. ....           | S19 |

## 1. Ring-closing metathesis (RCM) reactions under biphasic conditions

### 1.1. General RCM procedure

**Ru-2** (3 mg, 3  $\mu\text{mol}$ ) and  $[\text{BDMIM}^+][\text{BF}_4^-]$  (250 mg) were placed inside a flame-dried Schlenk tube (25 mL) equipped with a magnetic stir bar. The reaction mixture was heated to the indicated temperature. To a separate Schlenk tube (10 mL) was added substrate (300  $\mu\text{mol}$ ), toluene (2 mL) and *tert*-butylbenzene (approx. 7  $\mu\text{L}$ , standard for GC–MS). An aliquote (approx. 5  $\mu\text{L}$ ) was removed and subjected to GC–MS analysis. The substrate solution was added via a syringe in one portion to the catalyst solution and the reaction mixture was allowed to stir at 70 °C for 14 h. After cooling to room temperature, ethyl vinyl ether (1 mL) was added and the reaction mixture was allowed to stir for another 30 min. The IL phase was extracted with diethyl ether. The combined organic phases were subjected to GC–MS analysis.

### 1.2. Results

**Table S1:** RCM reactions under biphasic conditions.<sup>[a]</sup>

| Substrate                                    | TON <sup>[b]</sup> |
|----------------------------------------------|--------------------|
| Diethyl diallylmalonate                      | 55                 |
| 1,7-Octadiene                                | 70                 |
| Diallyl thioether                            | 31                 |
| <i>N,N</i> -Diallyltosylamine <sup>[c]</sup> | 58                 |

[a] **Ru-2**, toluene,  $[\text{BDMIM}^+][\text{BF}_4^-]$ , 70 °C, 14 h; [b] determined by comparing the ratios of product/standard (*tert*-butylbenzene) by GC–MS before and after the reaction; [c] substrate was prepared according to the literature [1-3].

## 2. References

1. Engle, K. M.; Lu, G.; Luo, S.-X.; Henling, L. M.; Takase, M. K.; Liu, P.; Houk, K. N.; Grubbs, R. *J. Am. Chem. Soc.*, **2015**, *137*, 5782-5792.

2. Gilbert, B. C.; Kalz, W.; Lindsay, C. I.; McGrail, P. T.; Parsons, A. F.; Whittaker, D. T. E. *J. Chem. Soc., Perkin Trans. 1* **2000**, 1187–1194.
3. So, C. M.; Kume, S.; Hayashi, T. *J. Am. Chem. Soc.* **2013**, *135*, 10990–10993.

### 3. Analytical data for Ru-2

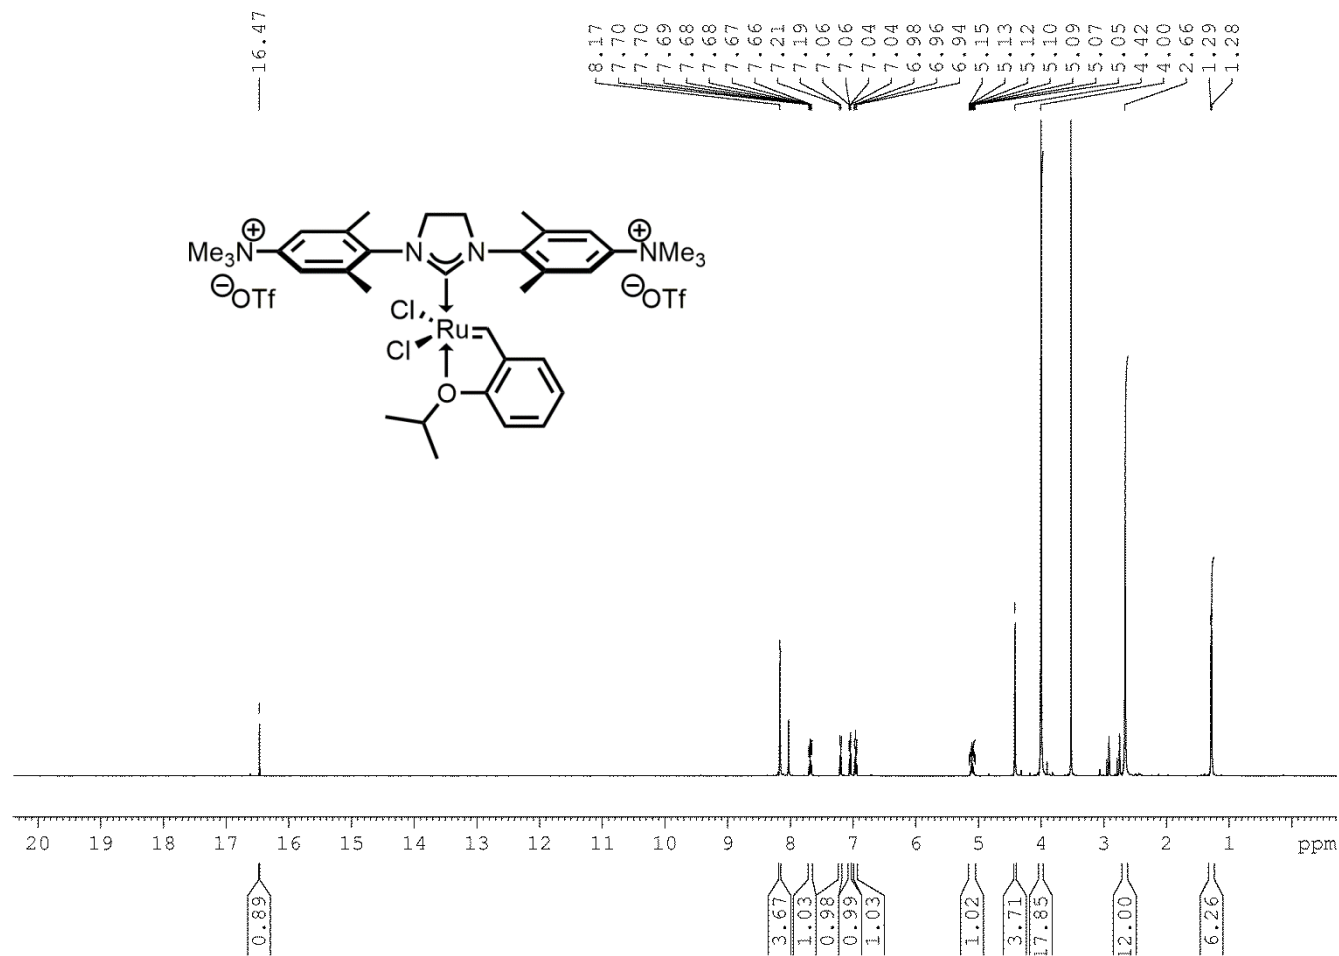

Figure S1:  $^1\text{H}$  NMR of Ru-2 in  $\text{DMF-}d_7$ .

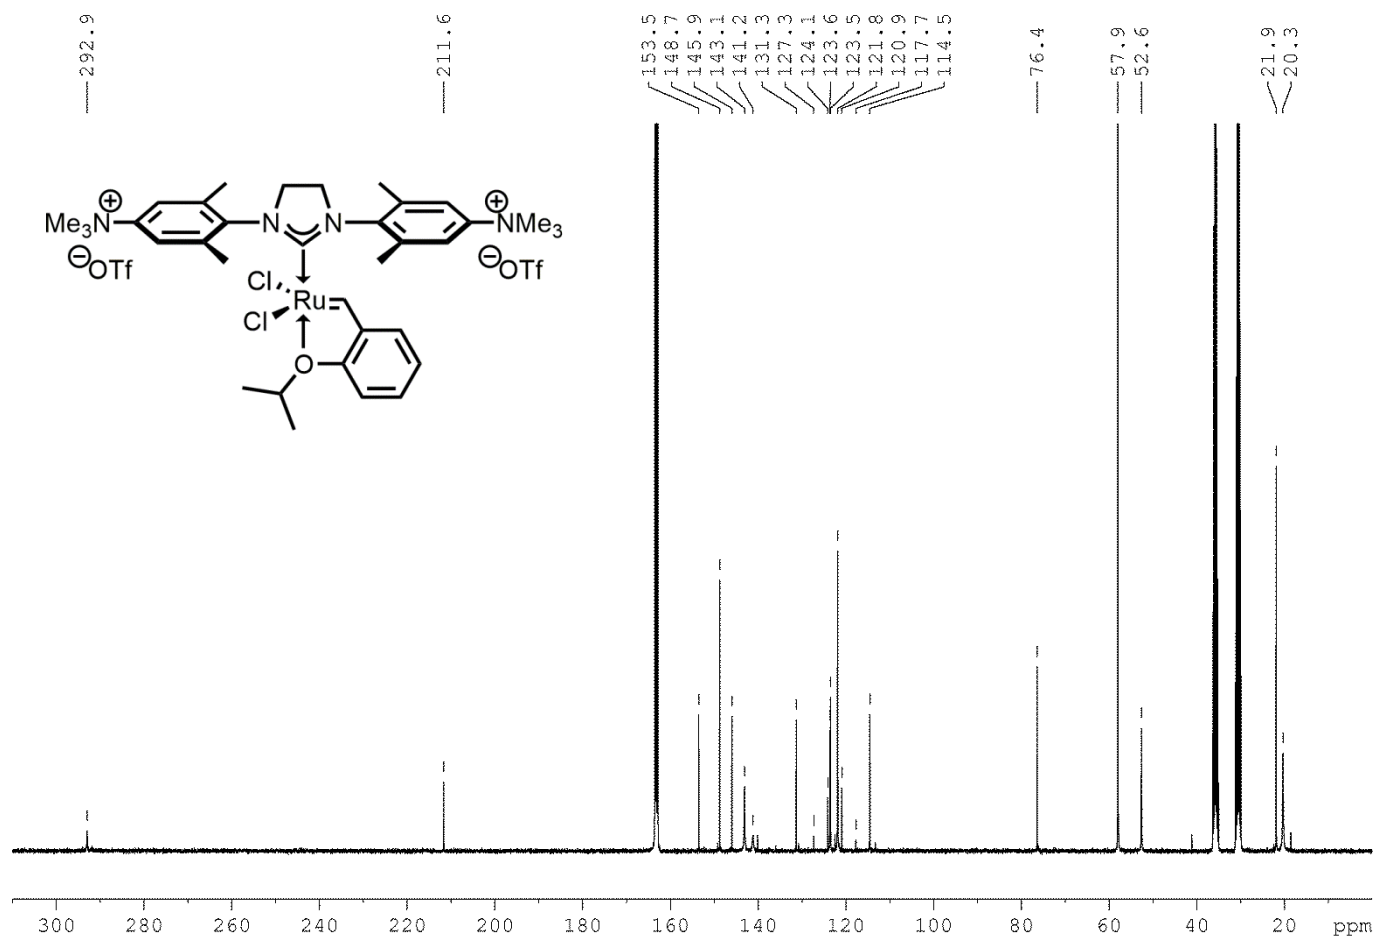

Figure S2:  $^{13}\text{C}$  NMR of Ru-2 in  $\text{DMF-}d_7$ .

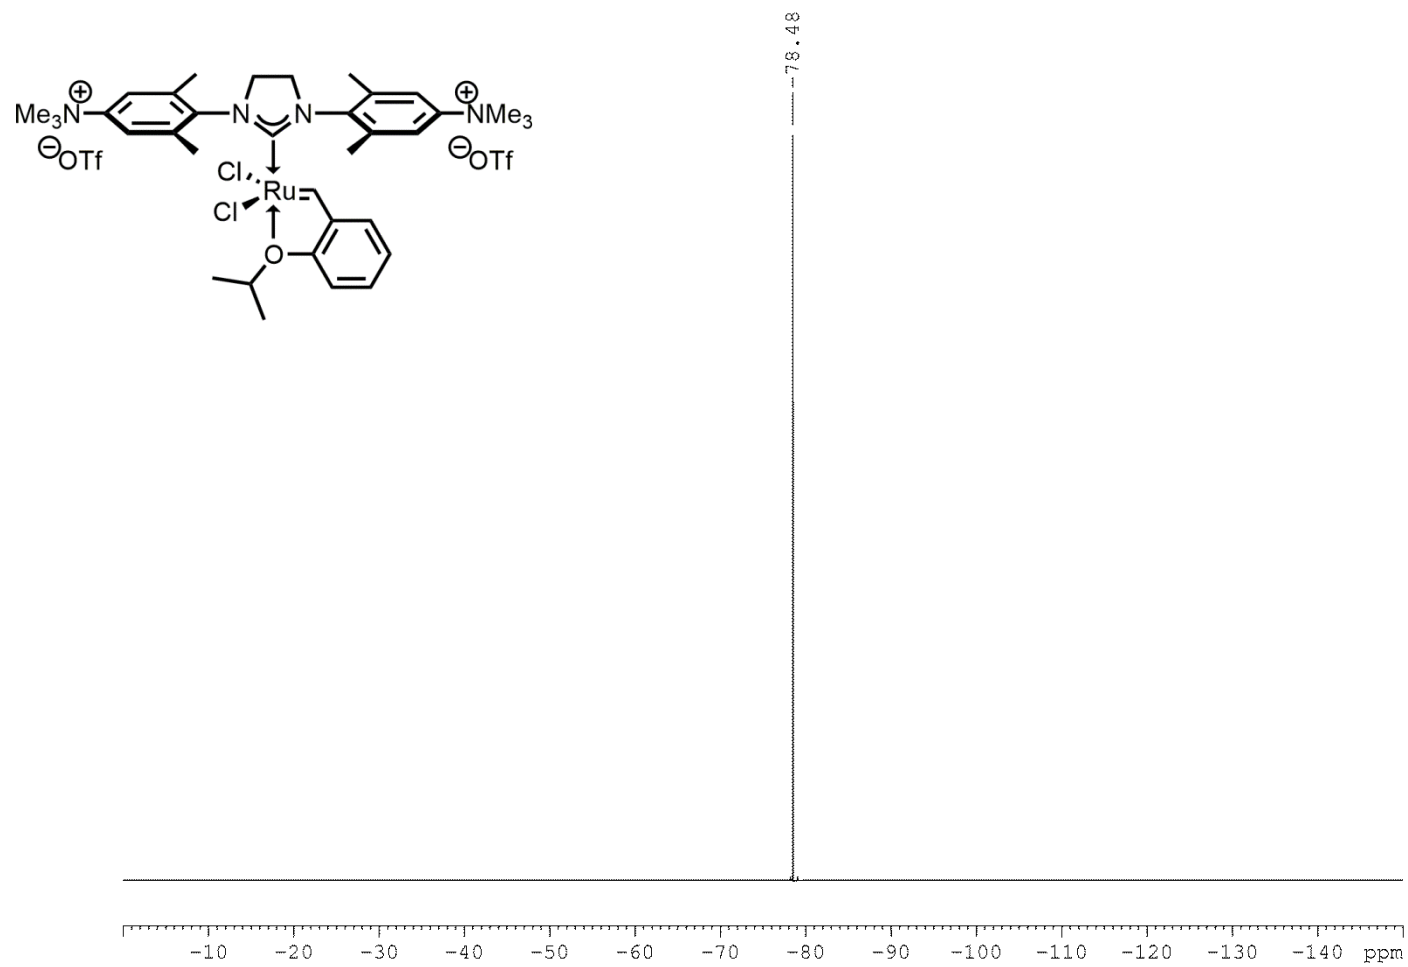

**Figure S3:**  $^{19}\text{F}$  NMR of Ru-2 in DMF- $d_7$ .

#### 4. Analytical data for polymers prepared by Ru-2

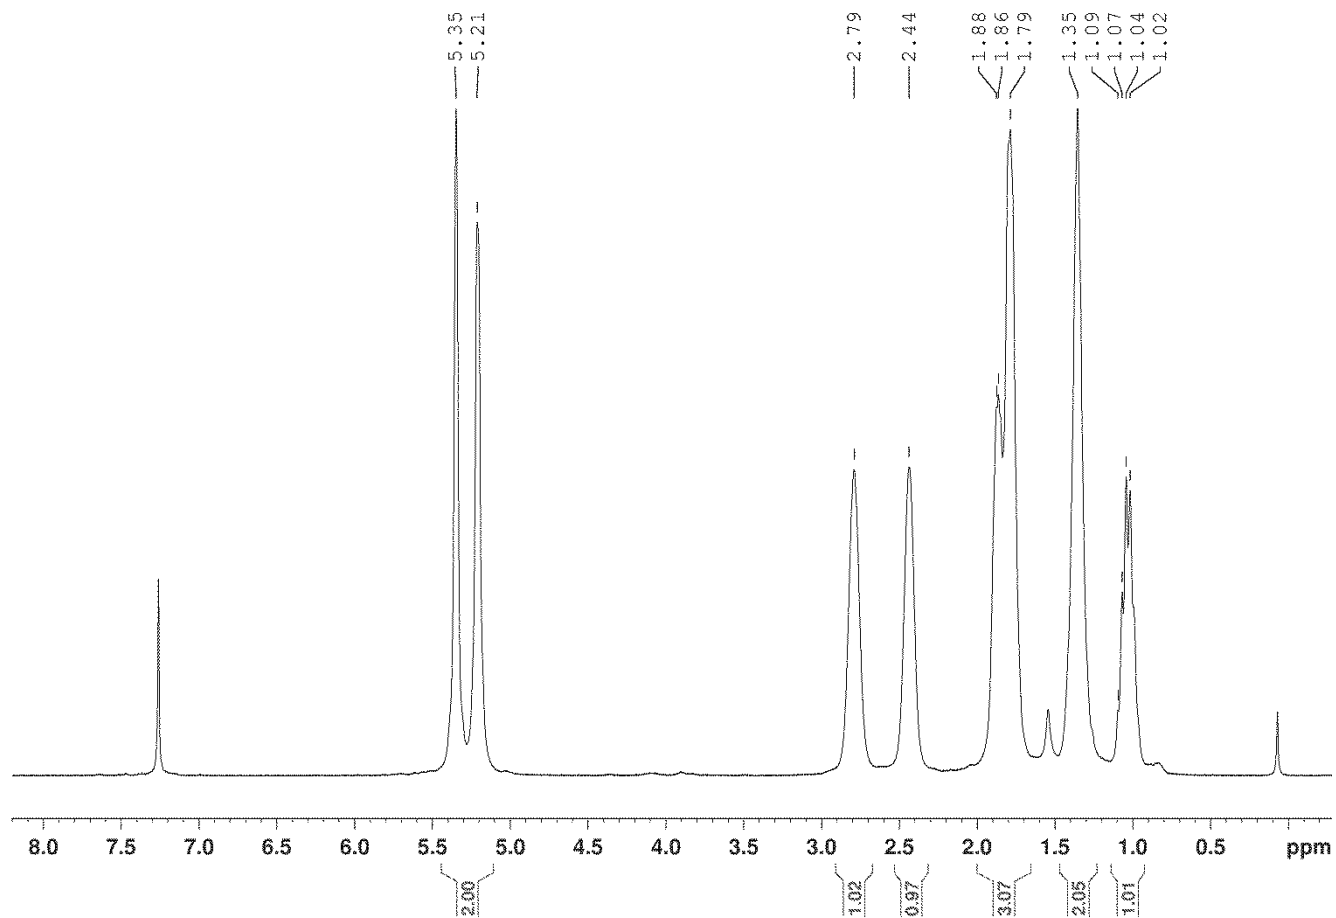

Figure S4:  $^1\text{H}$  NMR of poly-M1 in  $\text{CDCl}_3$ .



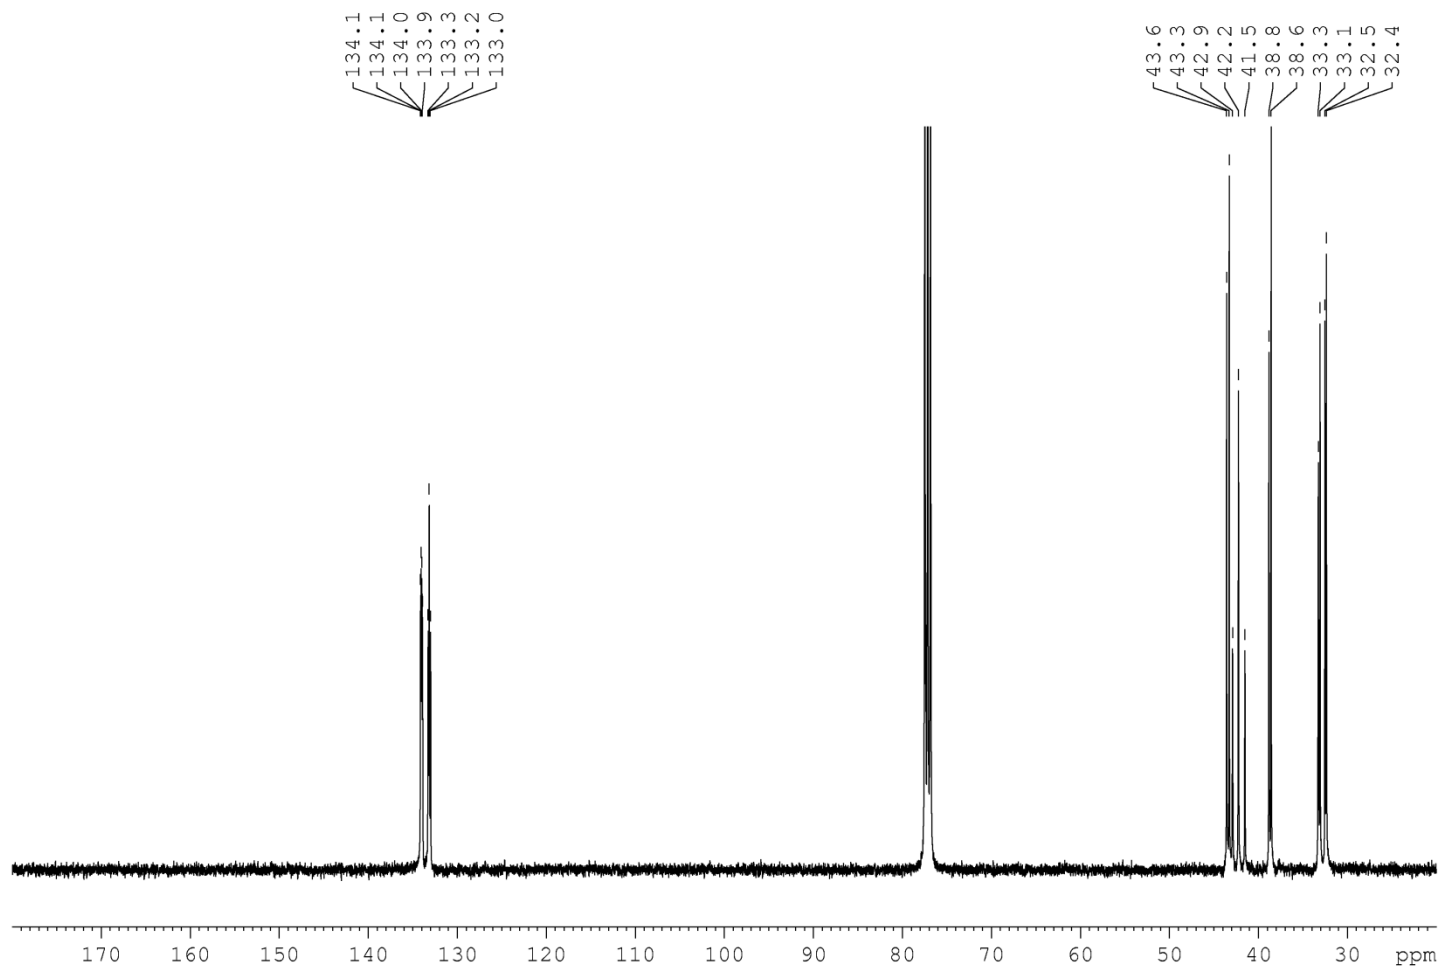

**Figure S5:**  $^{13}\text{C}$  NMR of poly-M1 in  $\text{CDCl}_3$ .

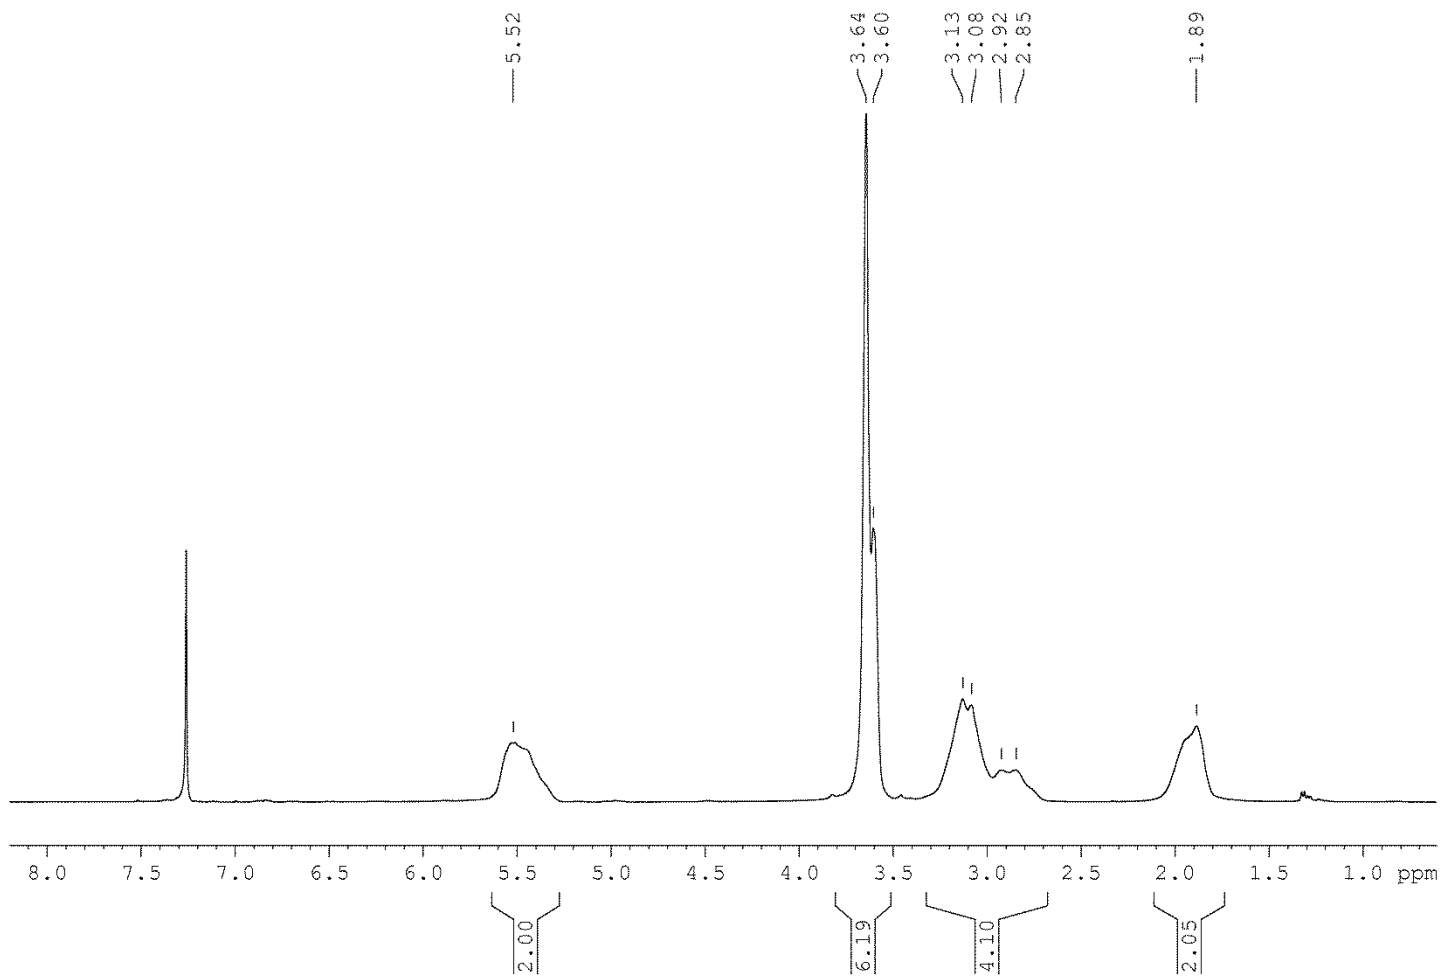

**Figure S6:**  $^1\text{H}$  NMR of poly-M2 in  $\text{CDCl}_3$ .

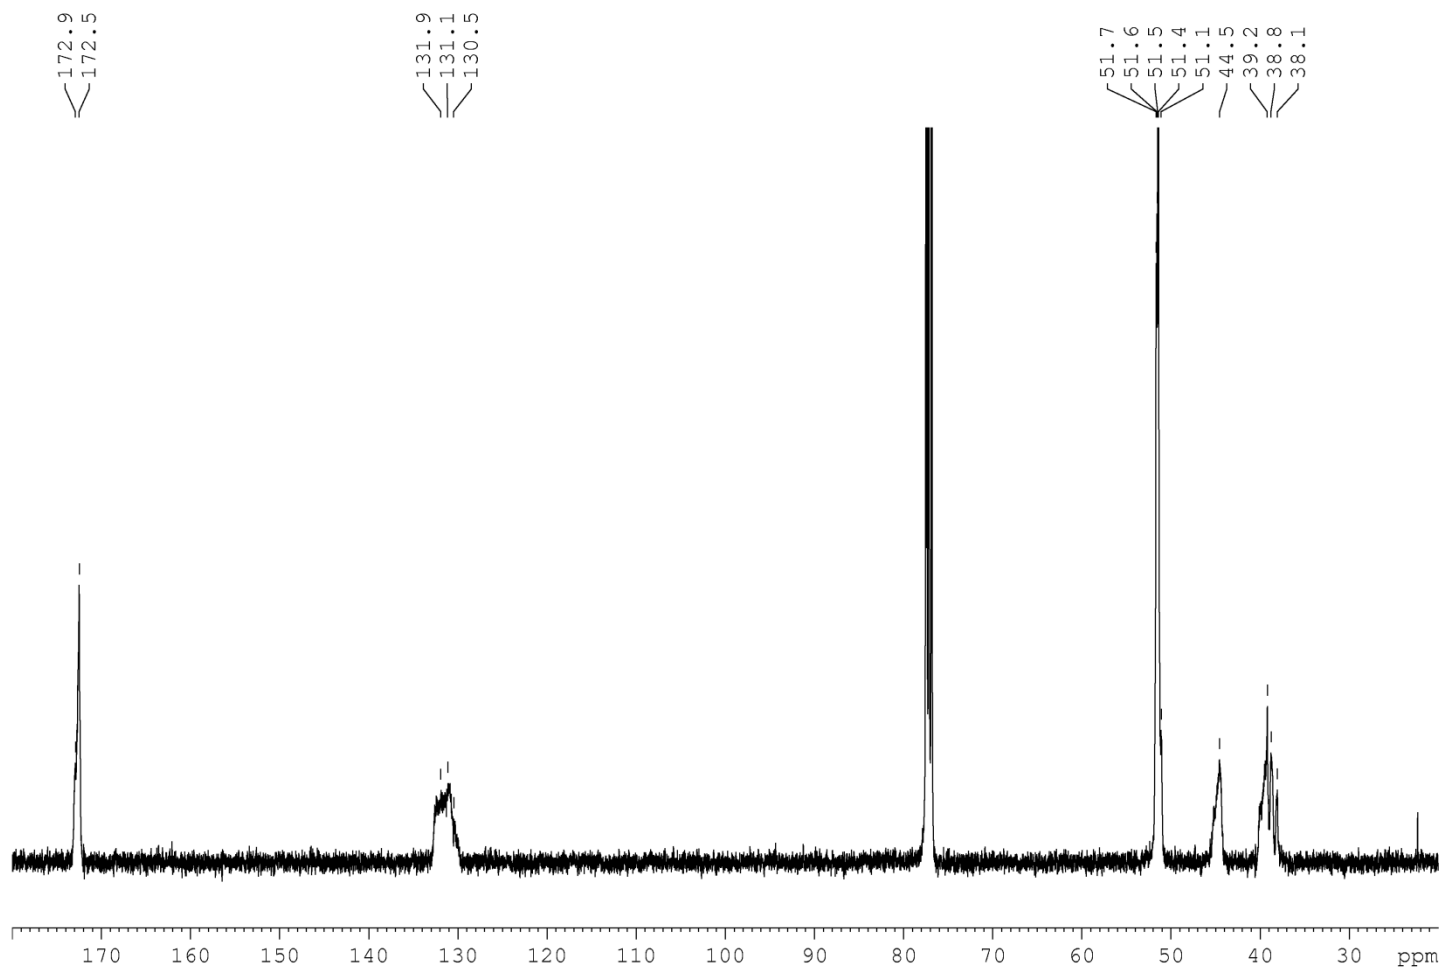

**Figure S7:**  $^{13}\text{C}$  NMR of poly-M2 in  $\text{CDCl}_3$ .

S11

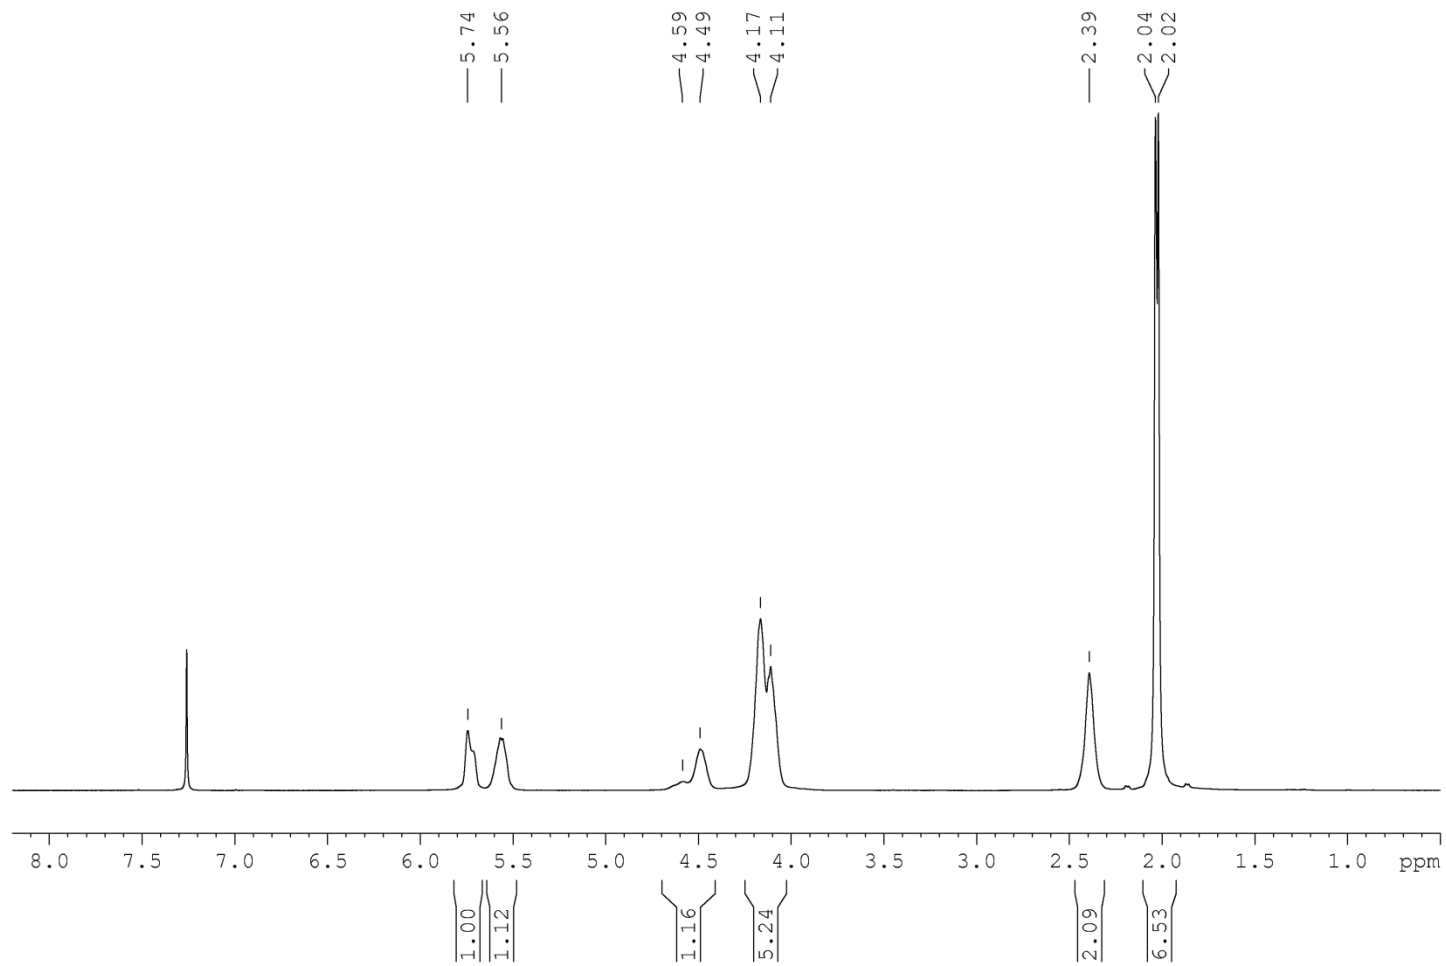

**Figure S8:**  $^1\text{H}$  NMR of poly-M3 in  $\text{CDCl}_3$ .

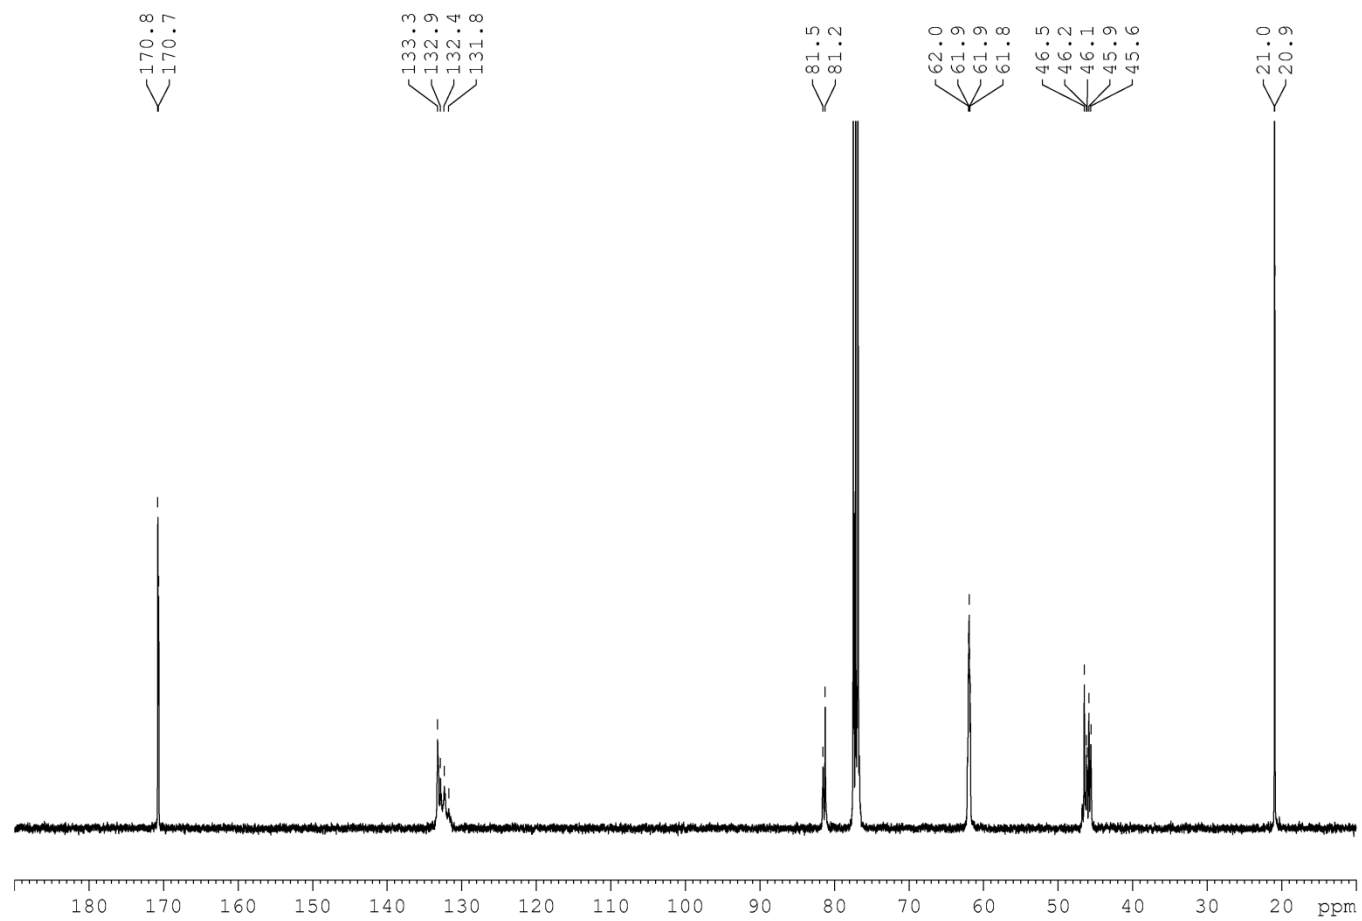

**Figure S9:**  $^{13}\text{C}$  NMR of poly-M3 in  $\text{CDCl}_3$ .

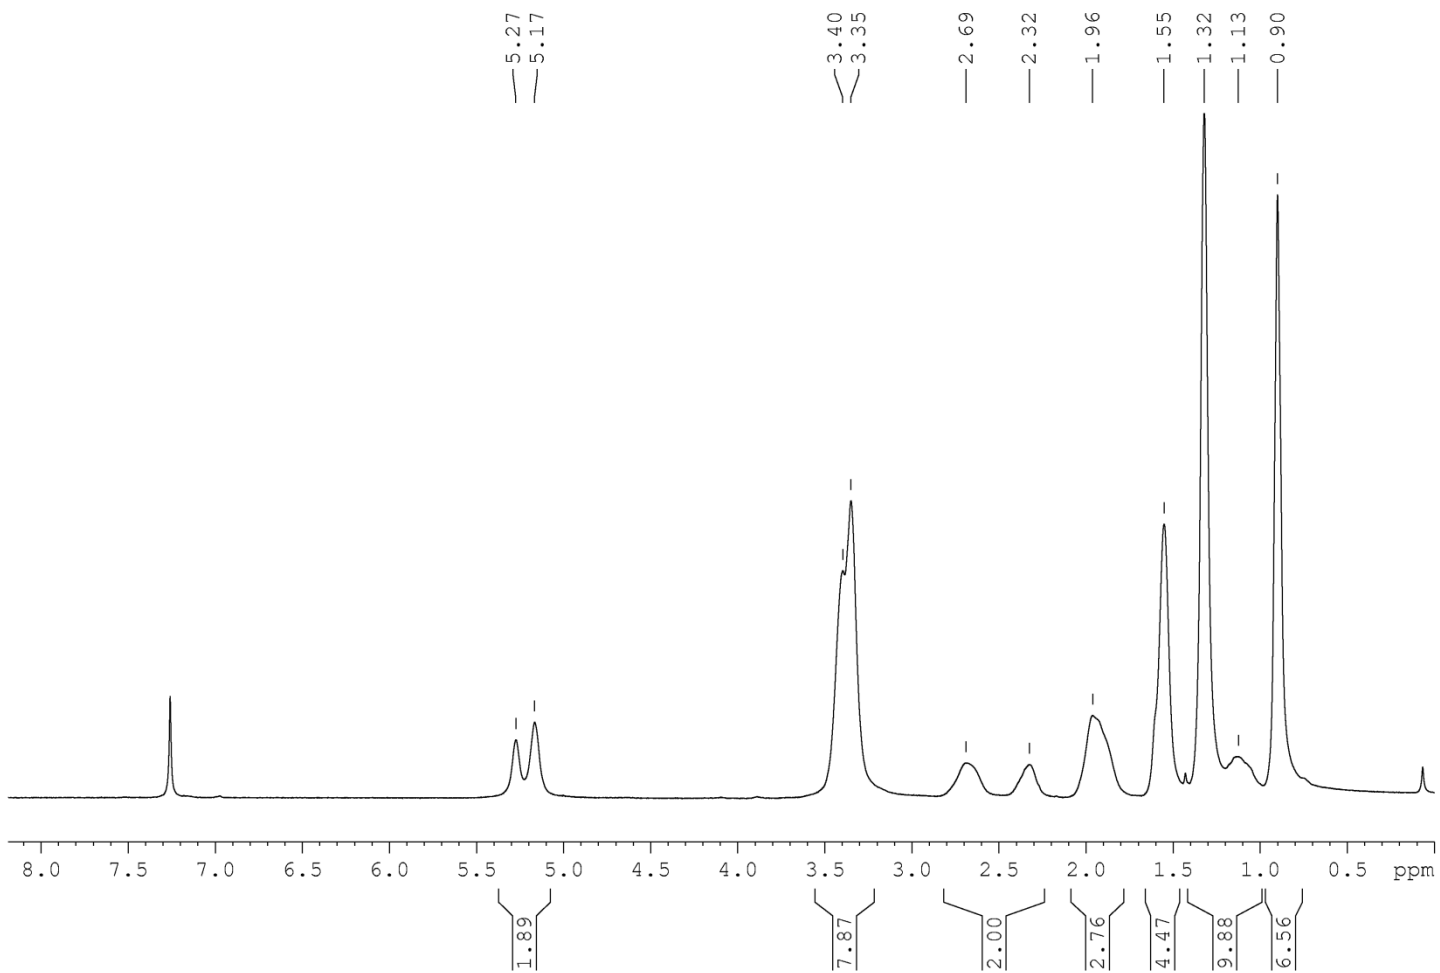

**Figure S10:**  $^1\text{H}$  NMR of poly-M4 in  $\text{CDCl}_3$ .

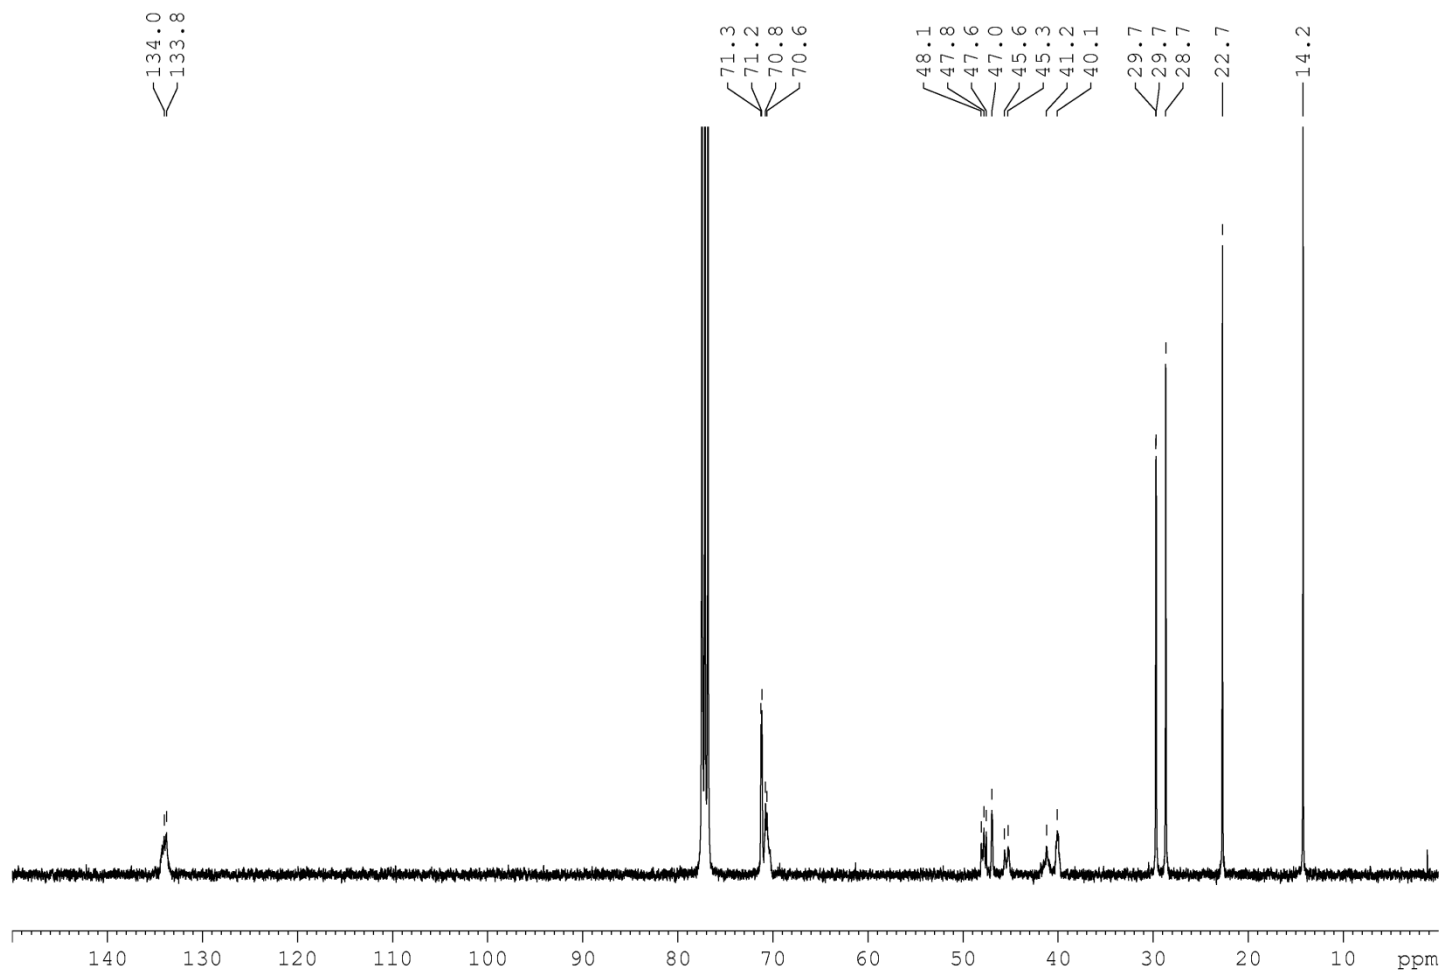

**Figure S11:** <sup>13</sup>C NMR of poly-M4 in CDCl<sub>3</sub>.

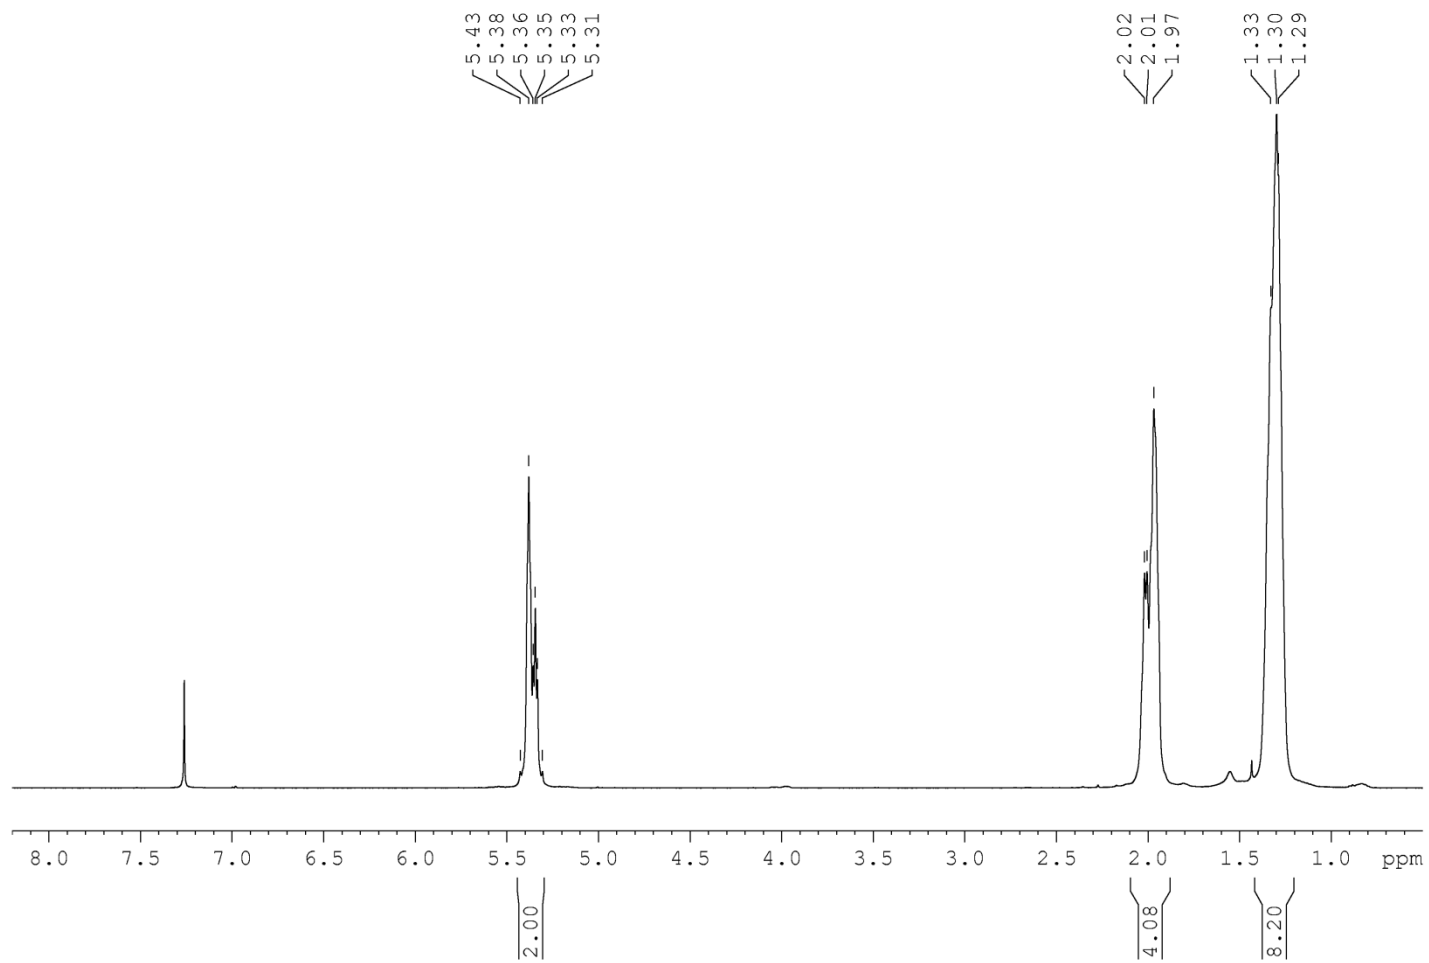

**Figure S12:**  $^1\text{H}$  NMR of poly-M6 in  $\text{CDCl}_3$ .

S16



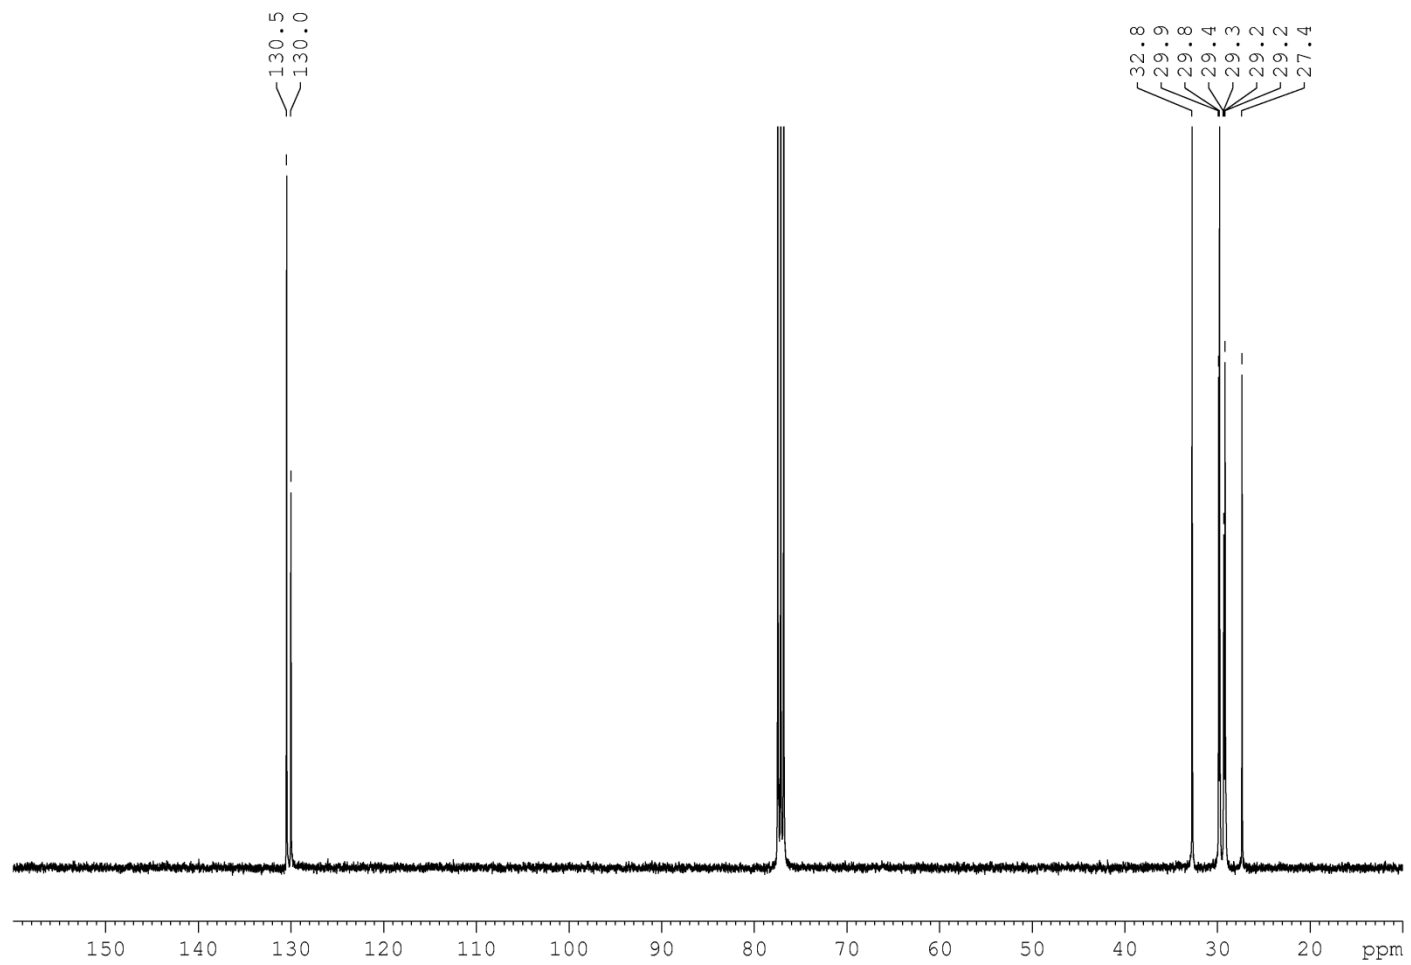

**Figure S13:**  $^{13}\text{C}$  NMR of poly-M6 in  $\text{CDCl}_3$ .

S17

## 5. X-ray crystallography data for Ru-2

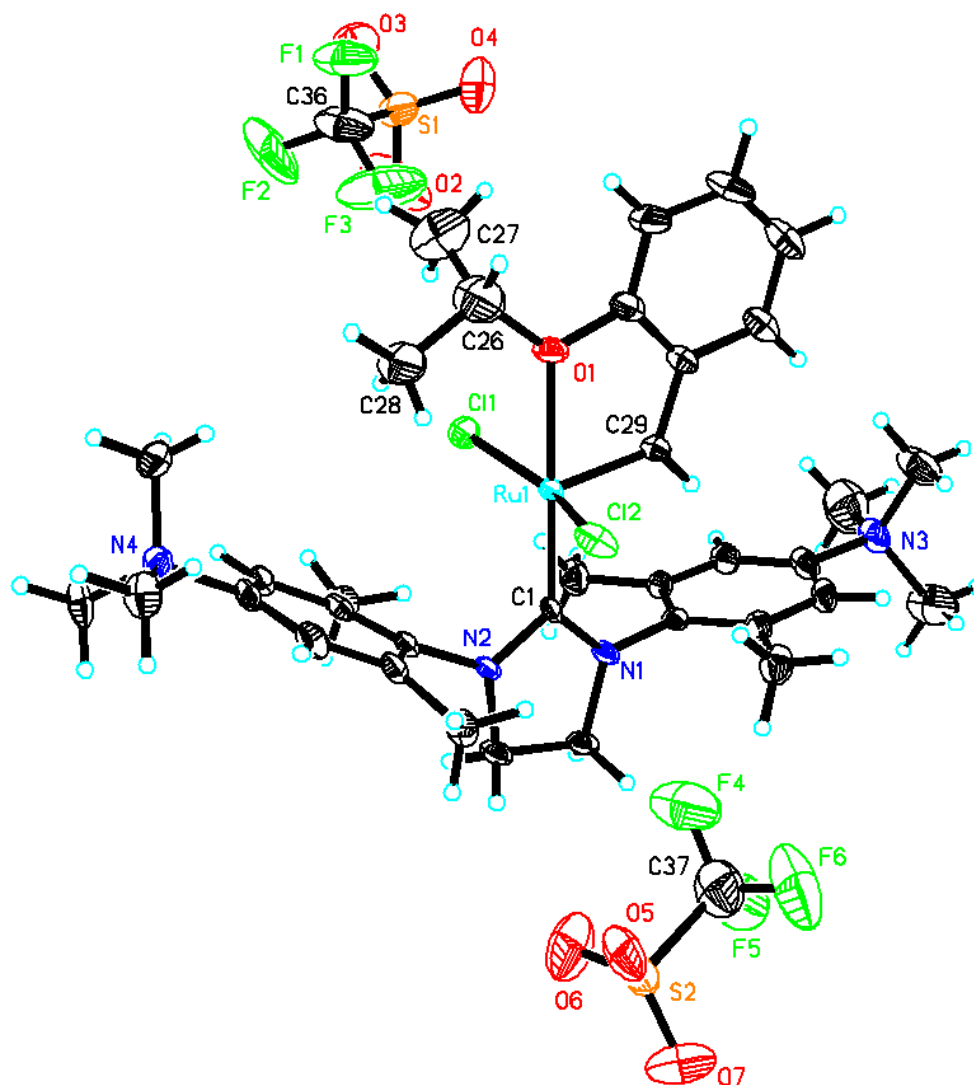

**Figure S14:** Single crystal X-ray structure of Ru-2. Cosolvent and disordered triflates have been omitted for clarity.

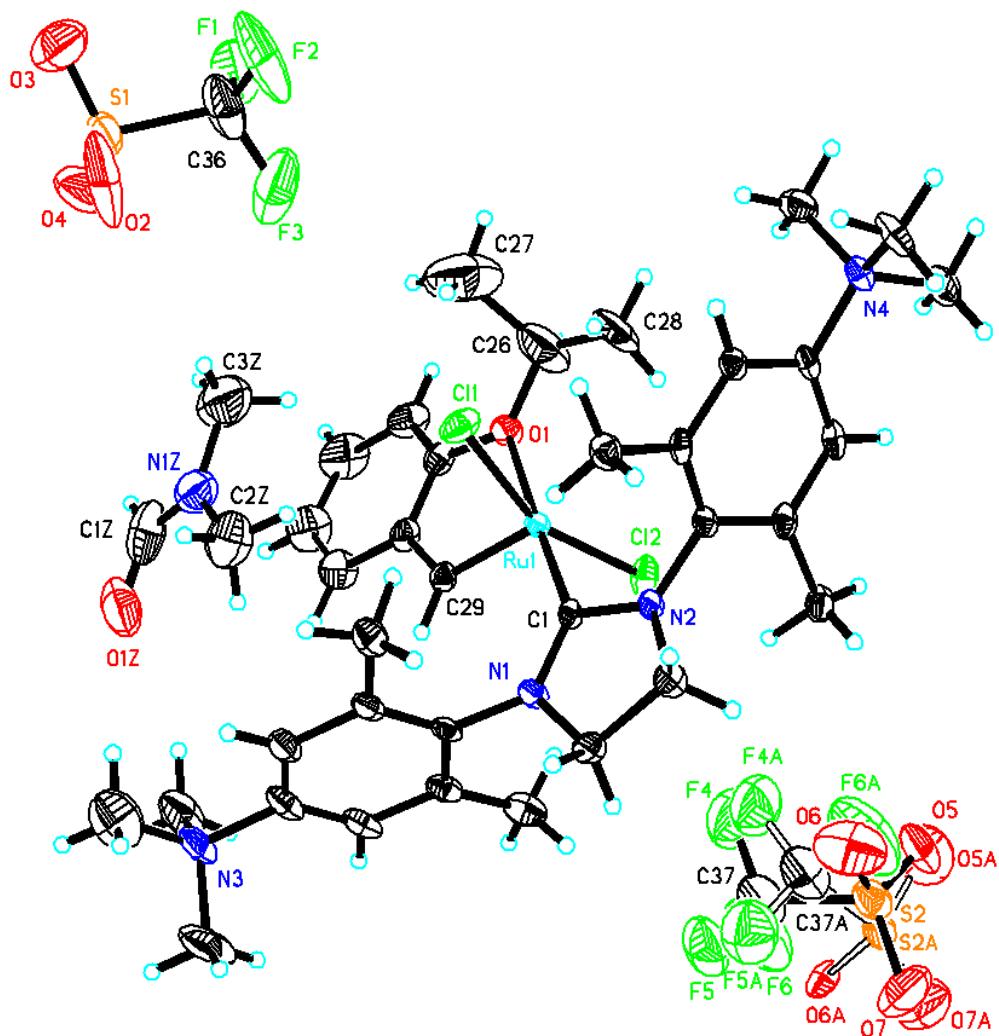

**Figure S15:** Single crystal X-ray structure of **Ru-2** with DMF in the crystal lattice and disordered triflates.

**Table S2:** Crystal data and structure refinement.

|                                   |                                                                                                                              |
|-----------------------------------|------------------------------------------------------------------------------------------------------------------------------|
| Empirical formula                 | C40 H57 Cl2 F6 N5 O8 Ru S2                                                                                                   |
| Formula weight                    | 1086.00                                                                                                                      |
| Temperature                       | 100(2) K                                                                                                                     |
| Wavelength                        | 0.71073 Å                                                                                                                    |
| Crystal system, space group       | Triclinic, P -1                                                                                                              |
| Unit cell dimensions              | a = 13.9808(6) Å $\alpha$ = 106.079(3)°<br>b = 13.9941(7) Å $\beta$ = 112.209(3)°<br>c = 17.5026(13) Å $\gamma$ = 99.300(2)° |
| Volume                            | 2906.6(3) Å <sup>3</sup>                                                                                                     |
| Z, Calculated density             | 2, 1.241 Mg/m <sup>3</sup>                                                                                                   |
| Absorption coefficient            | 0.497 mm <sup>-1</sup>                                                                                                       |
| F(000)                            | 1120                                                                                                                         |
| Crystal size                      | 0.57 x 0.19 x 0.17 mm                                                                                                        |
| Theta range for data collection   | 1.65 to 27.00 deg.                                                                                                           |
| Limiting indices                  | -17 ≤ h ≤ 17, -17 ≤ k ≤ 17, -22 ≤ l ≤ 22                                                                                     |
| Reflections collected / unique    | 48136 / 12684 [R(int) = 0.0540]                                                                                              |
| Completeness to theta = 27.00     | 99.8 %                                                                                                                       |
| Absorption correction             | Semi-empirical from equivalents                                                                                              |
| Max. and min. transmission        | 0.7457 and 0.6795                                                                                                            |
| Refinement method                 | Full-matrix least-squares on F <sup>2</sup>                                                                                  |
| Data / restraints / parameters    | 12684 / 114 / 645                                                                                                            |
| Goodness-of-fit on F <sup>2</sup> | 1.033                                                                                                                        |
| Final R indices [I > 2σ(I)]       | R1 = 0.0646, wR2 = 0.1508                                                                                                    |
| R indices (all data)              | R1 = 0.0875, wR2 = 0.1614                                                                                                    |
| Largest diff. peak and hole       | 3.073 and -1.562 e·Å <sup>-3</sup>                                                                                           |

\*\*\*\*\*

REMARK: Disordered solvent density (DMF) squeezed bey PLATON !

\*\*\*\*\*

**Table S3:** Atomic coordinates ( $\times 10^4$ ) and equivalent isotropic displacement parameters ( $\text{\AA}^2 \times 10^3$ )  $U(\text{eq})$  is defined as one third of the trace of the orthogonalized  $U_{ij}$  tensor.

---

|       | x        | y       | z       | U(eq) |
|-------|----------|---------|---------|-------|
| Ru(1) | 4647(1)  | 884(1)  | 2587(1) | 16(1) |
| Cl(1) | 5718(1)  | 335(1)  | 3672(1) | 32(1) |
| Cl(2) | 3094(1)  | 1022(1) | 1535(1) | 28(1) |
| O(1)  | 4208(3)  | -754(2) | 1633(2) | 26(1) |
| C(1)  | 4981(3)  | 2326(3) | 3403(3) | 15(1) |
| N(1)  | 5703(3)  | 3239(3) | 3626(2) | 20(1) |
| N(2)  | 4365(3)  | 2545(3) | 3837(2) | 17(1) |
| C(2)  | 5585(4)  | 4149(3) | 4216(3) | 23(1) |
| N(3)  | 9253(3)  | 4071(3) | 2826(3) | 33(1) |
| C(3)  | 4700(4)  | 3643(3) | 4419(3) | 25(1) |
| N(4)  | 1377(3)  | -608(3) | 3970(3) | 23(1) |
| C(4)  | 6586(3)  | 3404(3) | 3405(3) | 20(1) |
| C(5)  | 7575(4)  | 3344(3) | 3957(3) | 22(1) |
| C(6)  | 8452(4)  | 3568(3) | 3770(3) | 26(1) |
| C(7)  | 8307(4)  | 3822(3) | 3033(3) | 28(1) |
| C(8)  | 7322(4)  | 3876(3) | 2479(3) | 26(1) |
| C(9)  | 6434(4)  | 3676(3) | 2663(3) | 24(1) |
| C(10) | 7711(4)  | 3032(4) | 4740(3) | 32(1) |
| C(11) | 5368(4)  | 3739(4) | 2085(3) | 33(1) |
| C(12) | 9018(5)  | 3309(5) | 1948(4) | 54(2) |
| C(13) | 9424(7)  | 5142(5) | 2796(7) | 81(3) |
| C(14) | 10274(6) | 4008(7) | 3479(5) | 72(2) |
| C(15) | 3602(3)  | 1765(3) | 3878(3) | 18(1) |
| C(16) | 3983(3)  | 1299(3) | 4497(3) | 19(1) |
| C(17) | 3232(3)  | 508(3)  | 4497(3) | 20(1) |
| C(18) | 2141(3)  | 248(3)  | 3935(3) | 20(1) |
| C(19) | 1764(3)  | 776(4)  | 3386(3) | 23(1) |

S21

|       |          |          |         |        |
|-------|----------|----------|---------|--------|
| C(20) | 2493(3)  | 1571(3)  | 3360(3) | 21(1)  |
| C(21) | 5131(3)  | 1677(4)  | 5211(3) | 24(1)  |
| C(22) | 2065(4)  | 2219(4)  | 2834(3) | 27(1)  |
| C(23) | 1587(4)  | -1623(4) | 3632(4) | 36(1)  |
| C(24) | 217(4)   | -717(4)  | 3423(3) | 32(1)  |
| C(25) | 1531(4)  | -374(4)  | 4910(3) | 33(1)  |
| C(26) | 3493(7)  | -1719(5) | 1515(6) | 73(2)  |
| C(27) | 4454(10) | -2273(7) | 2084(8) | 113(4) |
| C(28) | 2980(6)  | -1443(5) | 2118(6) | 67(2)  |
| C(29) | 5557(3)  | 1067(3)  | 2080(3) | 20(1)  |
| C(30) | 5528(4)  | 172(4)   | 1404(3) | 25(1)  |
| C(31) | 6180(5)  | 247(4)   | 970(4)  | 39(1)  |
| C(32) | 6094(6)  | -636(5)  | 314(4)  | 54(2)  |
| C(33) | 5364(6)  | -1574(5) | 88(4)   | 54(2)  |
| C(34) | 4711(5)  | -1674(4) | 505(3)  | 37(1)  |
| C(35) | 4802(4)  | -796(4)  | 1160(3) | 25(1)  |
| S(1)  | 8892(1)  | -2741(1) | 4440(1) | 43(1)  |
| O(2)  | 9293(3)  | -1792(5) | 5098(4) | 97(2)  |
| O(3)  | 9213(4)  | -3572(4) | 4674(4) | 70(1)  |
| O(4)  | 8943(4)  | -2713(4) | 3641(4) | 75(2)  |
| C(36) | 7459(5)  | -3095(5) | 4124(6) | 69(2)  |
| F(1)  | 6936(3)  | -3949(3) | 3450(3) | 77(1)  |
| F(2)  | 7219(4)  | -3119(4) | 4756(3) | 106(2) |
| F(3)  | 7043(3)  | -2330(4) | 3893(4) | 113(2) |
| S(2)  | 2423(1)  | 5445(1)  | 2874(1) | 36(1)  |
| O(5)  | 1382(4)  | 4682(4)  | 2214(4) | 49(2)  |
| O(6)  | 2954(6)  | 5220(6)  | 3653(4) | 74(2)  |
| O(7)  | 2440(6)  | 6499(4)  | 3007(5) | 69(2)  |
| C(37) | 3301(5)  | 5132(6)  | 2396(5) | 62(2)  |
| F(4)  | 3281(6)  | 4150(5)  | 2241(5) | 86(2)  |
| F(5)  | 4299(3)  | 5779(4)  | 2930(4) | 69(1)  |
| F(6)  | 3002(6)  | 5169(6)  | 1606(4) | 111(2) |
| S(2A) | 2037(6)  | 5501(6)  | 2189(5) | 33(2)  |

|        |          |          |          |        |
|--------|----------|----------|----------|--------|
| O(5A)  | 1130(30) | 4590(30) | 1840(30) | 89(16) |
| O(6A)  | 2428(15) | 5727(15) | 1580(11) | 27(4)  |
| O(7A)  | 2100(30) | 6525(15) | 2680(20) | 67(11) |
| C(37A) | 3066(15) | 5113(18) | 2926(14) | 62(2)  |
| F(4A)  | 3170(30) | 4181(18) | 2560(20) | 86(2)  |
| F(5A)  | 4033(19) | 5844(18) | 3346(19) | 80(8)  |
| F(6A)  | 2710(40) | 5060(30) | 3540(30) | 111(2) |
| N(1Z)  | 8138(4)  | 13(4)    | 2458(4)  | 48(1)  |
| O(1Z)  | 9102(4)  | 942(5)   | 1979(4)  | 76(2)  |
| C(1Z)  | 8586(6)  | 102(7)   | 1920(4)  | 62(2)  |
| C(2Z)  | 8191(6)  | 955(6)   | 3111(5)  | 58(2)  |
| C(3Z)  | 7557(7)  | -981(6)  | 2417(7)  | 90(3)  |

---

**Table S4:** Bond lengths [Å] and angles [°].

---

|             |            |
|-------------|------------|
| Ru(1)-C(29) | 1.828(4)   |
| Ru(1)-C(1)  | 1.982(4)   |
| Ru(1)-O(1)  | 2.252(3)   |
| Ru(1)-Cl(2) | 2.3350(12) |
| Ru(1)-Cl(1) | 2.3389(12) |
| O(1)-C(35)  | 1.372(5)   |
| O(1)-C(26)  | 1.455(7)   |
| C(1)-N(1)   | 1.346(5)   |
| C(1)-N(2)   | 1.365(5)   |
| N(1)-C(4)   | 1.429(5)   |
| N(1)-C(2)   | 1.477(5)   |
| N(2)-C(15)  | 1.434(5)   |
| N(2)-C(3)   | 1.469(5)   |
| C(2)-C(3)   | 1.533(6)   |
| C(2)-H(2A)  | 0.9900     |
| C(2)-H(2B)  | 0.9900     |
| N(3)-C(12)  | 1.484(7)   |
| N(3)-C(14)  | 1.489(9)   |
| N(3)-C(13)  | 1.497(7)   |
| N(3)-C(7)   | 1.513(5)   |
| C(3)-H(3A)  | 0.9900     |
| C(3)-H(3B)  | 0.9900     |
| N(4)-C(24)  | 1.496(6)   |
| N(4)-C(18)  | 1.502(5)   |
| N(4)-C(23)  | 1.502(6)   |
| N(4)-C(25)  | 1.507(6)   |
| C(4)-C(5)   | 1.388(7)   |
| C(4)-C(9)   | 1.403(6)   |
| C(5)-C(6)   | 1.395(6)   |
| C(5)-C(10)  | 1.504(6)   |
| C(6)-C(7)   | 1.382(7)   |



|              |          |
|--------------|----------|
| C(6)-H(6)    | 0.9500   |
| C(7)-C(8)    | 1.381(7) |
| C(8)-C(9)    | 1.403(6) |
| C(8)-H(8)    | 0.9500   |
| C(9)-C(11)   | 1.484(7) |
| C(10)-H(10A) | 0.9800   |
| C(10)-H(10B) | 0.9800   |
| C(10)-H(10C) | 0.9800   |
| C(11)-H(11A) | 0.9800   |
| C(11)-H(11B) | 0.9800   |
| C(11)-H(11C) | 0.9800   |
| C(12)-H(12A) | 0.9800   |
| C(12)-H(12B) | 0.9800   |
| C(12)-H(12C) | 0.9800   |
| C(13)-H(13A) | 0.9800   |
| C(13)-H(13B) | 0.9800   |
| C(13)-H(13C) | 0.9800   |
| C(14)-H(14A) | 0.9800   |
| C(14)-H(14B) | 0.9800   |
| C(14)-H(14C) | 0.9800   |
| C(15)-C(16)  | 1.397(6) |
| C(15)-C(20)  | 1.402(6) |
| C(16)-C(17)  | 1.398(6) |
| C(16)-C(21)  | 1.504(6) |
| C(17)-C(18)  | 1.384(6) |
| C(17)-H(17)  | 0.9500   |
| C(18)-C(19)  | 1.372(6) |
| C(19)-C(20)  | 1.404(6) |
| C(19)-H(19)  | 0.9500   |
| C(20)-C(22)  | 1.500(6) |
| C(21)-H(21A) | 0.9800   |
| C(21)-H(21B) | 0.9800   |
| C(21)-H(21C) | 0.9800   |

|              |           |
|--------------|-----------|
| C(22)-H(22A) | 0.9800    |
| C(22)-H(22B) | 0.9800    |
| C(22)-H(22C) | 0.9800    |
| C(23)-H(23A) | 0.9800    |
| C(23)-H(23B) | 0.9800    |
| C(23)-H(23C) | 0.9800    |
| C(24)-H(24A) | 0.9800    |
| C(24)-H(24B) | 0.9800    |
| C(24)-H(24C) | 0.9800    |
| C(25)-H(25A) | 0.9800    |
| C(25)-H(25B) | 0.9800    |
| C(25)-H(25C) | 0.9800    |
| C(26)-C(28)  | 1.487(9)  |
| C(26)-C(27)  | 1.774(14) |
| C(26)-H(26)  | 1.0000    |
| C(27)-H(27A) | 0.9800    |
| C(27)-H(27B) | 0.9800    |
| C(27)-H(27C) | 0.9800    |
| C(28)-H(28A) | 0.9800    |
| C(28)-H(28B) | 0.9800    |
| C(28)-H(28C) | 0.9800    |
| C(29)-C(30)  | 1.449(6)  |
| C(29)-H(29)  | 0.9500    |
| C(30)-C(31)  | 1.398(6)  |
| C(30)-C(35)  | 1.399(6)  |
| C(31)-C(32)  | 1.387(8)  |
| C(31)-H(31)  | 0.9500    |
| C(32)-C(33)  | 1.377(9)  |
| C(32)-H(32)  | 0.9500    |
| C(33)-C(34)  | 1.379(8)  |
| C(33)-H(33)  | 0.9500    |
| C(34)-C(35)  | 1.379(6)  |
| C(34)-H(34)  | 0.9500    |

|              |           |
|--------------|-----------|
| S(1)-O(2)    | 1.352(5)  |
| S(1)-O(3)    | 1.419(5)  |
| S(1)-O(4)    | 1.438(5)  |
| S(1)-C(36)   | 1.804(6)  |
| C(36)-F(2)   | 1.279(9)  |
| C(36)-F(1)   | 1.280(7)  |
| C(36)-F(3)   | 1.382(9)  |
| S(2)-O(7)    | 1.424(5)  |
| S(2)-O(6)    | 1.434(6)  |
| S(2)-O(5)    | 1.461(5)  |
| S(2)-C(37)   | 1.774(6)  |
| C(37)-F(6)   | 1.303(7)  |
| C(37)-F(4)   | 1.318(7)  |
| C(37)-F(5)   | 1.333(7)  |
| S(2A)-O(7A)  | 1.420(10) |
| S(2A)-O(5A)  | 1.434(10) |
| S(2A)-O(6A)  | 1.451(9)  |
| S(2A)-C(37A) | 1.808(10) |
| C(37A)-F(4A) | 1.341(10) |
| C(37A)-F(5A) | 1.341(10) |
| C(37A)-F(6A) | 1.346(10) |
| N(1Z)-C(1Z)  | 1.335(9)  |
| N(1Z)-C(2Z)  | 1.455(8)  |
| N(1Z)-C(3Z)  | 1.462(9)  |
| O(1Z)-C(1Z)  | 1.230(9)  |
| C(1Z)-H(1Z)  | 0.9500    |
| C(2Z)-H(2Z1) | 0.9800    |
| C(2Z)-H(2Z2) | 0.9800    |
| C(2Z)-H(2Z3) | 0.9800    |
| C(3Z)-H(3Z1) | 0.9800    |
| C(3Z)-H(3Z2) | 0.9800    |
| C(3Z)-H(3Z3) | 0.9800    |

|                   |            |
|-------------------|------------|
| C(29)-Ru(1)-C(1)  | 101.54(17) |
| C(29)-Ru(1)-O(1)  | 79.35(15)  |
| C(1)-Ru(1)-O(1)   | 177.96(15) |
| C(29)-Ru(1)-Cl(2) | 99.33(14)  |
| C(1)-Ru(1)-Cl(2)  | 91.36(12)  |
| O(1)-Ru(1)-Cl(2)  | 86.68(9)   |
| C(29)-Ru(1)-Cl(1) | 98.27(14)  |
| C(1)-Ru(1)-Cl(1)  | 95.85(12)  |
| O(1)-Ru(1)-Cl(1)  | 85.81(9)   |
| Cl(2)-Ru(1)-Cl(1) | 159.22(5)  |
| C(35)-O(1)-C(26)  | 119.0(4)   |
| C(35)-O(1)-Ru(1)  | 110.6(3)   |
| C(26)-O(1)-Ru(1)  | 130.2(3)   |
| N(1)-C(1)-N(2)    | 106.4(3)   |
| N(1)-C(1)-Ru(1)   | 133.7(3)   |
| N(2)-C(1)-Ru(1)   | 119.8(3)   |
| C(1)-N(1)-C(4)    | 127.6(3)   |
| C(1)-N(1)-C(2)    | 114.2(3)   |
| C(4)-N(1)-C(2)    | 118.0(3)   |
| C(1)-N(2)-C(15)   | 123.9(3)   |
| C(1)-N(2)-C(3)    | 114.1(3)   |
| C(15)-N(2)-C(3)   | 120.8(3)   |
| N(1)-C(2)-C(3)    | 102.5(3)   |
| N(1)-C(2)-H(2A)   | 111.3      |
| C(3)-C(2)-H(2A)   | 111.3      |
| N(1)-C(2)-H(2B)   | 111.3      |
| C(3)-C(2)-H(2B)   | 111.3      |
| H(2A)-C(2)-H(2B)  | 109.2      |
| C(12)-N(3)-C(14)  | 106.3(5)   |
| C(12)-N(3)-C(13)  | 109.0(5)   |
| C(14)-N(3)-C(13)  | 109.5(6)   |
| C(12)-N(3)-C(7)   | 109.8(4)   |
| C(14)-N(3)-C(7)   | 113.1(4)   |

|                   |          |
|-------------------|----------|
| C(13)-N(3)-C(7)   | 109.0(4) |
| N(2)-C(3)-C(2)    | 102.3(3) |
| N(2)-C(3)-H(3A)   | 111.3    |
| C(2)-C(3)-H(3A)   | 111.3    |
| N(2)-C(3)-H(3B)   | 111.3    |
| C(2)-C(3)-H(3B)   | 111.3    |
| H(3A)-C(3)-H(3B)  | 109.2    |
| C(24)-N(4)-C(18)  | 112.3(3) |
| C(24)-N(4)-C(23)  | 108.6(4) |
| C(18)-N(4)-C(23)  | 109.3(3) |
| C(24)-N(4)-C(25)  | 106.5(3) |
| C(18)-N(4)-C(25)  | 110.1(3) |
| C(23)-N(4)-C(25)  | 110.1(4) |
| C(5)-C(4)-C(9)    | 122.4(4) |
| C(5)-C(4)-N(1)    | 119.0(4) |
| C(9)-C(4)-N(1)    | 118.5(4) |
| C(4)-C(5)-C(6)    | 118.8(4) |
| C(4)-C(5)-C(10)   | 121.4(4) |
| C(6)-C(5)-C(10)   | 119.8(4) |
| C(7)-C(6)-C(5)    | 119.2(5) |
| C(7)-C(6)-H(6)    | 120.4    |
| C(5)-C(6)-H(6)    | 120.4    |
| C(8)-C(7)-C(6)    | 122.2(4) |
| C(8)-C(7)-N(3)    | 118.1(4) |
| C(6)-C(7)-N(3)    | 119.7(4) |
| C(7)-C(8)-C(9)    | 119.7(4) |
| C(7)-C(8)-H(8)    | 120.2    |
| C(9)-C(8)-H(8)    | 120.2    |
| C(8)-C(9)-C(4)    | 117.7(4) |
| C(8)-C(9)-C(11)   | 120.9(4) |
| C(4)-C(9)-C(11)   | 121.4(4) |
| C(5)-C(10)-H(10A) | 109.5    |
| C(5)-C(10)-H(10B) | 109.5    |

|                     |          |
|---------------------|----------|
| H(10A)-C(10)-H(10B) | 109.5    |
| C(5)-C(10)-H(10C)   | 109.5    |
| H(10A)-C(10)-H(10C) | 109.5    |
| H(10B)-C(10)-H(10C) | 109.5    |
| C(9)-C(11)-H(11A)   | 109.5    |
| C(9)-C(11)-H(11B)   | 109.5    |
| H(11A)-C(11)-H(11B) | 109.5    |
| C(9)-C(11)-H(11C)   | 109.5    |
| H(11A)-C(11)-H(11C) | 109.5    |
| H(11B)-C(11)-H(11C) | 109.5    |
| N(3)-C(12)-H(12A)   | 109.5    |
| N(3)-C(12)-H(12B)   | 109.5    |
| H(12A)-C(12)-H(12B) | 109.5    |
| N(3)-C(12)-H(12C)   | 109.5    |
| H(12A)-C(12)-H(12C) | 109.5    |
| H(12B)-C(12)-H(12C) | 109.5    |
| N(3)-C(13)-H(13A)   | 109.5    |
| N(3)-C(13)-H(13B)   | 109.5    |
| H(13A)-C(13)-H(13B) | 109.5    |
| N(3)-C(13)-H(13C)   | 109.5    |
| H(13A)-C(13)-H(13C) | 109.5    |
| H(13B)-C(13)-H(13C) | 109.5    |
| N(3)-C(14)-H(14A)   | 109.5    |
| N(3)-C(14)-H(14B)   | 109.5    |
| H(14A)-C(14)-H(14B) | 109.5    |
| N(3)-C(14)-H(14C)   | 109.5    |
| H(14A)-C(14)-H(14C) | 109.5    |
| H(14B)-C(14)-H(14C) | 109.5    |
| C(16)-C(15)-C(20)   | 121.9(4) |
| C(16)-C(15)-N(2)    | 118.9(4) |
| C(20)-C(15)-N(2)    | 119.0(4) |
| C(15)-C(16)-C(17)   | 117.8(4) |
| C(15)-C(16)-C(21)   | 123.0(4) |

|                     |          |
|---------------------|----------|
| C(17)-C(16)-C(21)   | 118.9(4) |
| C(18)-C(17)-C(16)   | 120.4(4) |
| C(18)-C(17)-H(17)   | 119.8    |
| C(16)-C(17)-H(17)   | 119.8    |
| C(19)-C(18)-C(17)   | 121.2(4) |
| C(19)-C(18)-N(4)    | 121.1(4) |
| C(17)-C(18)-N(4)    | 117.7(4) |
| C(18)-C(19)-C(20)   | 120.1(4) |
| C(18)-C(19)-H(19)   | 119.9    |
| C(20)-C(19)-H(19)   | 119.9    |
| C(15)-C(20)-C(19)   | 117.9(4) |
| C(15)-C(20)-C(22)   | 122.5(4) |
| C(19)-C(20)-C(22)   | 119.5(4) |
| C(16)-C(21)-H(21A)  | 109.5    |
| C(16)-C(21)-H(21B)  | 109.5    |
| H(21A)-C(21)-H(21B) | 109.5    |
| C(16)-C(21)-H(21C)  | 109.5    |
| H(21A)-C(21)-H(21C) | 109.5    |
| H(21B)-C(21)-H(21C) | 109.5    |
| C(20)-C(22)-H(22A)  | 109.5    |
| C(20)-C(22)-H(22B)  | 109.5    |
| H(22A)-C(22)-H(22B) | 109.5    |
| C(20)-C(22)-H(22C)  | 109.5    |
| H(22A)-C(22)-H(22C) | 109.5    |
| H(22B)-C(22)-H(22C) | 109.5    |
| N(4)-C(23)-H(23A)   | 109.5    |
| N(4)-C(23)-H(23B)   | 109.5    |
| H(23A)-C(23)-H(23B) | 109.5    |
| N(4)-C(23)-H(23C)   | 109.5    |
| H(23A)-C(23)-H(23C) | 109.5    |
| H(23B)-C(23)-H(23C) | 109.5    |
| N(4)-C(24)-H(24A)   | 109.5    |
| N(4)-C(24)-H(24B)   | 109.5    |

|                     |          |
|---------------------|----------|
| H(24A)-C(24)-H(24B) | 109.5    |
| N(4)-C(24)-H(24C)   | 109.5    |
| H(24A)-C(24)-H(24C) | 109.5    |
| H(24B)-C(24)-H(24C) | 109.5    |
| N(4)-C(25)-H(25A)   | 109.5    |
| N(4)-C(25)-H(25B)   | 109.5    |
| H(25A)-C(25)-H(25B) | 109.5    |
| N(4)-C(25)-H(25C)   | 109.5    |
| H(25A)-C(25)-H(25C) | 109.5    |
| H(25B)-C(25)-H(25C) | 109.5    |
| O(1)-C(26)-C(28)    | 107.3(5) |
| O(1)-C(26)-C(27)    | 100.6(6) |
| C(28)-C(26)-C(27)   | 101.7(7) |
| O(1)-C(26)-H(26)    | 115.2    |
| C(28)-C(26)-H(26)   | 115.2    |
| C(27)-C(26)-H(26)   | 115.2    |
| C(26)-C(27)-H(27A)  | 109.5    |
| C(26)-C(27)-H(27B)  | 109.5    |
| H(27A)-C(27)-H(27B) | 109.5    |
| C(26)-C(27)-H(27C)  | 109.5    |
| H(27A)-C(27)-H(27C) | 109.5    |
| H(27B)-C(27)-H(27C) | 109.5    |
| C(26)-C(28)-H(28A)  | 109.5    |
| C(26)-C(28)-H(28B)  | 109.5    |
| H(28A)-C(28)-H(28B) | 109.5    |
| C(26)-C(28)-H(28C)  | 109.5    |
| H(28A)-C(28)-H(28C) | 109.5    |
| H(28B)-C(28)-H(28C) | 109.5    |
| C(30)-C(29)-Ru(1)   | 118.6(3) |
| C(30)-C(29)-H(29)   | 120.7    |
| Ru(1)-C(29)-H(29)   | 120.7    |
| C(31)-C(30)-C(35)   | 118.9(4) |
| C(31)-C(30)-C(29)   | 122.4(4) |



|                   |          |
|-------------------|----------|
| C(35)-C(30)-C(29) | 118.7(4) |
| C(32)-C(31)-C(30) | 119.5(5) |
| C(32)-C(31)-H(31) | 120.3    |
| C(30)-C(31)-H(31) | 120.3    |
| C(33)-C(32)-C(31) | 119.9(5) |
| C(33)-C(32)-H(32) | 120.0    |
| C(31)-C(32)-H(32) | 120.0    |
| C(32)-C(33)-C(34) | 122.0(5) |
| C(32)-C(33)-H(33) | 119.0    |
| C(34)-C(33)-H(33) | 119.0    |
| C(33)-C(34)-C(35) | 117.9(5) |
| C(33)-C(34)-H(34) | 121.0    |
| C(35)-C(34)-H(34) | 121.0    |
| O(1)-C(35)-C(34)  | 125.5(4) |
| O(1)-C(35)-C(30)  | 112.7(4) |
| C(34)-C(35)-C(30) | 121.8(4) |
| O(2)-S(1)-O(3)    | 117.1(4) |
| O(2)-S(1)-O(4)    | 113.3(4) |
| O(3)-S(1)-O(4)    | 113.2(3) |
| O(2)-S(1)-C(36)   | 104.1(3) |
| O(3)-S(1)-C(36)   | 103.8(4) |
| O(4)-S(1)-C(36)   | 103.4(4) |
| F(2)-C(36)-F(1)   | 110.6(6) |
| F(2)-C(36)-F(3)   | 102.2(6) |
| F(1)-C(36)-F(3)   | 107.1(7) |
| F(2)-C(36)-S(1)   | 114.4(6) |
| F(1)-C(36)-S(1)   | 112.2(4) |
| F(3)-C(36)-S(1)   | 109.7(5) |
| O(7)-S(2)-O(6)    | 116.8(5) |
| O(7)-S(2)-O(5)    | 114.1(4) |
| O(6)-S(2)-O(5)    | 115.1(4) |
| O(7)-S(2)-C(37)   | 109.2(4) |
| O(6)-S(2)-C(37)   | 96.4(4)  |

|                     |           |
|---------------------|-----------|
| O(5)-S(2)-C(37)     | 102.4(3)  |
| F(6)-C(37)-F(4)     | 102.0(7)  |
| F(6)-C(37)-F(5)     | 109.2(6)  |
| F(4)-C(37)-F(5)     | 111.6(6)  |
| F(6)-C(37)-S(2)     | 113.9(6)  |
| F(4)-C(37)-S(2)     | 110.8(5)  |
| F(5)-C(37)-S(2)     | 109.4(5)  |
| O(7A)-S(2A)-O(5A)   | 125(3)    |
| O(7A)-S(2A)-O(6A)   | 99.5(19)  |
| O(5A)-S(2A)-O(6A)   | 118(2)    |
| O(7A)-S(2A)-C(37A)  | 106.9(17) |
| O(5A)-S(2A)-C(37A)  | 99(2)     |
| O(6A)-S(2A)-C(37A)  | 106.6(11) |
| F(4A)-C(37A)-F(5A)  | 110.0(12) |
| F(4A)-C(37A)-F(6A)  | 108.4(16) |
| F(5A)-C(37A)-F(6A)  | 108.0(15) |
| F(4A)-C(37A)-S(2A)  | 116(2)    |
| F(5A)-C(37A)-S(2A)  | 111.8(18) |
| F(6A)-C(37A)-S(2A)  | 102(3)    |
| C(1Z)-N(1Z)-C(2Z)   | 119.0(6)  |
| C(1Z)-N(1Z)-C(3Z)   | 123.9(7)  |
| C(2Z)-N(1Z)-C(3Z)   | 117.1(6)  |
| O(1Z)-C(1Z)-N(1Z)   | 123.3(7)  |
| O(1Z)-C(1Z)-H(1Z)   | 118.4     |
| N(1Z)-C(1Z)-H(1Z)   | 118.4     |
| N(1Z)-C(2Z)-H(2Z1)  | 109.5     |
| N(1Z)-C(2Z)-H(2Z2)  | 109.5     |
| H(2Z1)-C(2Z)-H(2Z2) | 109.5     |
| N(1Z)-C(2Z)-H(2Z3)  | 109.5     |
| H(2Z1)-C(2Z)-H(2Z3) | 109.5     |
| H(2Z2)-C(2Z)-H(2Z3) | 109.5     |
| N(1Z)-C(3Z)-H(3Z1)  | 109.5     |
| N(1Z)-C(3Z)-H(3Z2)  | 109.5     |

|                     |       |
|---------------------|-------|
| H(3Z1)-C(3Z)-H(3Z2) | 109.5 |
| N(1Z)-C(3Z)-H(3Z3)  | 109.5 |
| H(3Z1)-C(3Z)-H(3Z3) | 109.5 |
| H(3Z2)-C(3Z)-H(3Z3) | 109.5 |

---

**Table S5:** Anisotropic displacement parameters ( $\text{Å}^2 \times 10^3$ ). The anisotropic displacement factor exponent takes the form:  $-2 \pi^2 [h^2 a^{*2} U_{11} + 2 h k a^* b^* U_{12}]$ .

|       | U11   | U22   | U33    | U23   | U13    | U12   |
|-------|-------|-------|--------|-------|--------|-------|
| Ru(1) | 18(1) | 13(1) | 18(1)  | 4(1)  | 12(1)  | 4(1)  |
| Cl(1) | 48(1) | 35(1) | 32(1)  | 22(1) | 25(1)  | 26(1) |
| Cl(2) | 20(1) | 35(1) | 21(1)  | 1(1)  | 6(1)   | 10(1) |
| O(1)  | 29(2) | 14(1) | 33(2)  | 1(1)  | 19(2)  | 4(1)  |
| C(1)  | 17(2) | 20(2) | 14(2)  | 7(2)  | 11(2)  | 8(2)  |
| N(1)  | 25(2) | 12(2) | 24(2)  | 1(1)  | 17(2)  | 2(1)  |
| N(2)  | 20(2) | 15(2) | 20(2)  | 3(1)  | 14(2)  | 6(1)  |
| C(2)  | 30(2) | 15(2) | 26(2)  | 2(2)  | 18(2)  | 7(2)  |
| N(3)  | 33(2) | 28(2) | 39(2)  | 5(2)  | 27(2)  | -2(2) |
| C(3)  | 30(2) | 18(2) | 26(2)  | 0(2)  | 19(2)  | 5(2)  |
| N(4)  | 18(2) | 25(2) | 26(2)  | 8(2)  | 12(2)  | 2(2)  |
| C(4)  | 26(2) | 10(2) | 28(2)  | 3(2)  | 19(2)  | 1(2)  |
| C(5)  | 25(2) | 16(2) | 28(2)  | 7(2)  | 17(2)  | 2(2)  |
| C(6)  | 25(2) | 23(2) | 32(3)  | 7(2)  | 17(2)  | 3(2)  |
| C(7)  | 30(3) | 21(2) | 30(3)  | 0(2)  | 22(2)  | -4(2) |
| C(8)  | 33(3) | 19(2) | 23(2)  | 4(2)  | 17(2)  | -5(2) |
| C(9)  | 30(2) | 16(2) | 23(2)  | 3(2)  | 14(2)  | 0(2)  |
| C(10) | 32(3) | 38(3) | 38(3)  | 18(2) | 22(2)  | 10(2) |
| C(11) | 37(3) | 28(2) | 26(3)  | 9(2)  | 12(2)  | 0(2)  |
| C(12) | 57(4) | 41(3) | 64(4)  | -1(3) | 47(4)  | 0(3)  |
| C(13) | 98(6) | 35(3) | 150(8) | 25(4) | 106(6) | 8(4)  |
| C(14) | 66(3) | 81(3) | 72(3)  | 27(2) | 39(2)  | 14(2) |
| C(15) | 22(2) | 19(2) | 20(2)  | 6(2)  | 16(2)  | 8(2)  |
| C(16) | 16(2) | 24(2) | 19(2)  | 5(2)  | 12(2)  | 8(2)  |
| C(17) | 20(2) | 24(2) | 19(2)  | 9(2)  | 13(2)  | 9(2)  |
| C(18) | 16(2) | 24(2) | 21(2)  | 6(2)  | 13(2)  | 4(2)  |
| C(19) | 12(2) | 34(2) | 22(2)  | 8(2)  | 9(2)   | 7(2)  |

|       |         |        |        |        |        |        |
|-------|---------|--------|--------|--------|--------|--------|
| C(20) | 21(2)   | 31(2)  | 19(2)  | 10(2)  | 14(2)  | 12(2)  |
| C(21) | 18(2)   | 29(2)  | 22(2)  | 10(2)  | 7(2)   | 5(2)   |
| C(22) | 24(2)   | 39(3)  | 29(3)  | 20(2)  | 15(2)  | 16(2)  |
| C(23) | 40(3)   | 23(2)  | 51(3)  | 14(2)  | 28(3)  | 6(2)   |
| C(24) | 16(2)   | 37(3)  | 32(3)  | 10(2)  | 6(2)   | -2(2)  |
| C(25) | 24(2)   | 47(3)  | 27(3)  | 14(2)  | 15(2)  | -3(2)  |
| C(26) | 82(4)   | 38(3)  | 102(5) | 4(3)   | 68(4)  | -5(3)  |
| C(27) | 189(12) | 60(5)  | 131(9) | 45(6)  | 101(9) | 47(7)  |
| C(28) | 73(5)   | 26(3)  | 113(6) | 9(3)   | 73(5)  | -5(3)  |
| C(29) | 20(2)   | 19(2)  | 21(2)  | 5(2)   | 11(2)  | 8(2)   |
| C(30) | 31(2)   | 26(2)  | 26(2)  | 8(2)   | 19(2)  | 14(2)  |
| C(31) | 53(3)   | 38(3)  | 41(3)  | 12(2)  | 36(3)  | 19(3)  |
| C(32) | 79(5)   | 60(4)  | 52(4)  | 20(3)  | 53(4)  | 34(4)  |
| C(33) | 86(5)   | 41(3)  | 43(4)  | 1(3)   | 42(4)  | 28(3)  |
| C(34) | 53(3)   | 24(2)  | 32(3)  | 4(2)   | 21(3)  | 15(2)  |
| C(35) | 29(2)   | 27(2)  | 21(2)  | 7(2)   | 13(2)  | 14(2)  |
| S(1)  | 31(1)   | 29(1)  | 73(1)  | 15(1)  | 30(1)  | 7(1)   |
| O(2)  | 24(2)   | 119(5) | 87(4)  | -32(4) | 23(3)  | -5(3)  |
| O(3)  | 74(3)   | 72(3)  | 75(4)  | 41(3)  | 27(3)  | 36(3)  |
| O(4)  | 86(4)   | 78(4)  | 90(4)  | 47(3)  | 60(3)  | 15(3)  |
| C(36) | 41(4)   | 36(3)  | 102(6) | -17(4) | 41(4)  | -8(3)  |
| F(1)  | 62(2)   | 37(2)  | 105(4) | -11(2) | 42(3)  | 6(2)   |
| F(2)  | 67(3)   | 134(4) | 96(4)  | -10(3) | 70(3)  | -13(3) |
| F(3)  | 46(2)   | 53(3)  | 184(6) | 3(3)   | 22(3)  | 22(2)  |
| S(2)  | 40(1)   | 33(1)  | 37(1)  | 8(1)   | 24(1)  | 4(1)   |
| O(5)  | 38(3)   | 53(3)  | 49(3)  | 6(2)   | 30(3)  | -4(2)  |
| O(6)  | 89(5)   | 78(4)  | 41(3)  | 36(3)  | 12(3)  | 11(3)  |
| O(7)  | 61(4)   | 45(3)  | 86(4)  | 15(3)  | 19(3)  | 29(3)  |
| C(37) | 51(3)   | 65(4)  | 66(4)  | 21(3)  | 31(3)  | 7(3)   |
| F(4)  | 77(3)   | 66(3)  | 111(4) | 10(2)  | 52(3)  | 25(2)  |
| F(5)  | 35(2)   | 72(3)  | 75(3)  | 10(2)  | 19(2)  | -1(2)  |
| F(6)  | 113(4)  | 140(4) | 83(3)  | 31(3)  | 69(3)  | 1(3)   |
| S(2A) | 31(4)   | 51(5)  | 41(4)  | 36(4)  | 23(3)  | 20(3)  |

|        |        |        |        |       |       |       |
|--------|--------|--------|--------|-------|-------|-------|
| O(5A)  | 87(17) | 92(17) | 88(17) | 35(8) | 42(9) | 21(7) |
| O(6A)  | 40(6)  | 37(6)  | 19(6)  | 18(5) | 17(5) | 26(5) |
| O(7A)  | 70(13) | 59(12) | 69(13) | 27(7) | 23(7) | 26(7) |
| C(37A) | 51(3)  | 65(4)  | 66(4)  | 21(3) | 31(3) | 7(3)  |
| F(4A)  | 77(3)  | 66(3)  | 111(4) | 10(2) | 52(3) | 25(2) |
| F(5A)  | 76(9)  | 84(10) | 79(10) | 23(6) | 37(7) | 25(6) |
| F(6A)  | 113(4) | 140(4) | 83(3)  | 31(3) | 69(3) | 1(3)  |
| N(1Z)  | 44(3)  | 41(3)  | 54(3)  | 15(2) | 16(3) | 14(2) |
| O(1Z)  | 42(3)  | 122(5) | 90(4)  | 68(4) | 34(3) | 26(3) |
| C(1Z)  | 52(4)  | 95(6)  | 40(4)  | 15(4) | 21(3) | 42(4) |
| C(2Z)  | 58(4)  | 67(4)  | 48(4)  | 14(3) | 25(3) | 26(4) |
| C(3Z)  | 58(5)  | 58(5)  | 122(8) | 34(5) | 10(5) | 13(4) |

---

**Table S6:** Hydrogen coordinates ( $\times 10^4$ ) and isotropic displacement parameters ( $\text{Å}^2 \times 10^3$ ).

---

|        | x     | y    | z    | U(eq) |
|--------|-------|------|------|-------|
| H(2A)  | 5357  | 4631 | 3912 | 28    |
| H(2B)  | 6270  | 4533 | 4765 | 28    |
| H(3A)  | 4989  | 3724 | 5052 | 30    |
| H(3B)  | 4090  | 3944 | 4270 | 30    |
| H(6)   | 9141  | 3546 | 4145 | 31    |
| H(8)   | 7247  | 4047 | 1974 | 32    |
| H(10A) | 7530  | 3522 | 5145 | 49    |
| H(10B) | 8464  | 3044 | 5052 | 49    |
| H(10C) | 7229  | 2327 | 4532 | 49    |
| H(11A) | 5201  | 4323 | 2416 | 49    |
| H(11B) | 4806  | 3088 | 1895 | 49    |
| H(11C) | 5394  | 3847 | 1562 | 49    |
| H(12A) | 8881  | 2603 | 1956 | 82    |
| H(12B) | 9640  | 3465 | 1823 | 82    |
| H(12C) | 8378  | 3356 | 1486 | 82    |
| H(13A) | 10036 | 5309 | 2661 | 122   |
| H(13B) | 9578  | 5650 | 3373 | 122   |
| H(13C) | 8769  | 5167 | 2334 | 122   |
| H(14A) | 10150 | 3320 | 3524 | 108   |
| H(14B) | 10505 | 4548 | 4062 | 108   |
| H(14C) | 10839 | 4114 | 3283 | 108   |
| H(17)  | 3472  | 147  | 4885 | 23    |
| H(19)  | 1009  | 603  | 3022 | 28    |
| H(21A) | 5622  | 1922 | 4980 | 36    |
| H(21B) | 5315  | 1105 | 5397 | 36    |
| H(21C) | 5206  | 2252 | 5722 | 36    |
| H(22A) | 1325  | 1830 | 2373 | 40    |
| H(22B) | 2527  | 2381 | 2556 | 40    |

|        |      |       |      |     |
|--------|------|-------|------|-----|
| H(22C) | 2061 | 2868  | 3230 | 40  |
| H(23A) | 1461 | -1781 | 3014 | 53  |
| H(23B) | 1098 | -2181 | 3663 | 53  |
| H(23C) | 2339 | -1570 | 3997 | 53  |
| H(24A) | 73   | -53   | 3626 | 48  |
| H(24B) | -251 | -1261 | 3486 | 48  |
| H(24C) | 68   | -907  | 2797 | 48  |
| H(25A) | 2263 | -363  | 5284 | 50  |
| H(25B) | 998  | -913  | 4920 | 50  |
| H(25C) | 1431 | 307   | 5136 | 50  |
| H(26)  | 2981 | -2172 | 885  | 88  |
| H(27A) | 4847 | -2499 | 1741 | 169 |
| H(27B) | 4079 | -2874 | 2153 | 169 |
| H(27C) | 4967 | -1752 | 2671 | 169 |
| H(28A) | 3539 | -1141 | 2736 | 100 |
| H(28B) | 2460 | -2071 | 2030 | 100 |
| H(28C) | 2603 | -934  | 1984 | 100 |
| H(29)  | 6038 | 1736  | 2257 | 24  |
| H(31)  | 6676 | 897   | 1123 | 47  |
| H(32)  | 6540 | -594  | 20   | 65  |
| H(33)  | 5307 | -2170 | -368 | 65  |
| H(34)  | 4215 | -2327 | 345  | 44  |
| H(1Z)  | 8503 | -514  | 1468 | 74  |
| H(2Z1) | 8861 | 1164  | 3660 | 87  |
| H(2Z2) | 7567 | 820   | 3237 | 87  |
| H(2Z3) | 8182 | 1515  | 2877 | 87  |
| H(3Z1) | 7565 | -1553 | 1948 | 134 |
| H(3Z2) | 6806 | -1000 | 2285 | 134 |
| H(3Z3) | 7909 | -1058 | 2989 | 134 |

---



**Table S7:** Torsion angles [°].

---

|                        |           |
|------------------------|-----------|
| C(29)-Ru(1)-O(1)-C(35) | -0.7(3)   |
| C(1)-Ru(1)-O(1)-C(35)  | 115(4)    |
| Cl(2)-Ru(1)-O(1)-C(35) | 99.4(3)   |
| Cl(1)-Ru(1)-O(1)-C(35) | -100.0(3) |
| C(29)-Ru(1)-O(1)-C(26) | 173.7(6)  |
| C(1)-Ru(1)-O(1)-C(26)  | -70(4)    |
| Cl(2)-Ru(1)-O(1)-C(26) | -86.1(6)  |
| Cl(1)-Ru(1)-O(1)-C(26) | 74.5(6)   |
| C(29)-Ru(1)-C(1)-N(1)  | -4.0(5)   |
| O(1)-Ru(1)-C(1)-N(1)   | -120(4)   |
| Cl(2)-Ru(1)-C(1)-N(1)  | -103.8(4) |
| Cl(1)-Ru(1)-C(1)-N(1)  | 95.7(4)   |
| C(29)-Ru(1)-C(1)-N(2)  | 172.1(3)  |
| O(1)-Ru(1)-C(1)-N(2)   | 56(4)     |
| Cl(2)-Ru(1)-C(1)-N(2)  | 72.3(3)   |
| Cl(1)-Ru(1)-C(1)-N(2)  | -88.2(3)  |
| N(2)-C(1)-N(1)-C(4)    | 173.8(4)  |
| Ru(1)-C(1)-N(1)-C(4)   | -9.7(7)   |
| N(2)-C(1)-N(1)-C(2)    | -1.8(5)   |
| Ru(1)-C(1)-N(1)-C(2)   | 174.7(3)  |
| N(1)-C(1)-N(2)-C(15)   | -170.7(4) |
| Ru(1)-C(1)-N(2)-C(15)  | 12.2(5)   |
| N(1)-C(1)-N(2)-C(3)    | -2.9(5)   |
| Ru(1)-C(1)-N(2)-C(3)   | -180.0(3) |
| C(1)-N(1)-C(2)-C(3)    | 5.3(5)    |
| C(4)-N(1)-C(2)-C(3)    | -170.8(4) |
| C(1)-N(2)-C(3)-C(2)    | 6.0(5)    |
| C(15)-N(2)-C(3)-C(2)   | 174.2(4)  |
| N(1)-C(2)-C(3)-N(2)    | -6.2(4)   |
| C(1)-N(1)-C(4)-C(5)    | -87.1(5)  |
| C(2)-N(1)-C(4)-C(5)    | 88.3(5)   |

|                         |           |
|-------------------------|-----------|
| C(1)-N(1)-C(4)-C(9)     | 96.2(5)   |
| C(2)-N(1)-C(4)-C(9)     | -88.3(5)  |
| C(9)-C(4)-C(5)-C(6)     | 0.4(6)    |
| N(1)-C(4)-C(5)-C(6)     | -176.1(4) |
| C(9)-C(4)-C(5)-C(10)    | -178.9(4) |
| N(1)-C(4)-C(5)-C(10)    | 4.5(6)    |
| C(4)-C(5)-C(6)-C(7)     | -1.3(6)   |
| C(10)-C(5)-C(6)-C(7)    | 178.0(4)  |
| C(5)-C(6)-C(7)-C(8)     | 0.9(7)    |
| C(5)-C(6)-C(7)-N(3)     | 179.7(4)  |
| C(12)-N(3)-C(7)-C(8)    | -62.6(6)  |
| C(14)-N(3)-C(7)-C(8)    | 178.8(5)  |
| C(13)-N(3)-C(7)-C(8)    | 56.7(6)   |
| C(12)-N(3)-C(7)-C(6)    | 118.5(5)  |
| C(14)-N(3)-C(7)-C(6)    | -0.1(7)   |
| C(13)-N(3)-C(7)-C(6)    | -122.2(6) |
| C(6)-C(7)-C(8)-C(9)     | 0.5(7)    |
| N(3)-C(7)-C(8)-C(9)     | -178.4(4) |
| C(7)-C(8)-C(9)-C(4)     | -1.4(6)   |
| C(7)-C(8)-C(9)-C(11)    | 179.4(4)  |
| C(5)-C(4)-C(9)-C(8)     | 0.9(6)    |
| N(1)-C(4)-C(9)-C(8)     | 177.5(4)  |
| C(5)-C(4)-C(9)-C(11)    | -179.8(4) |
| N(1)-C(4)-C(9)-C(11)    | -3.2(6)   |
| C(1)-N(2)-C(15)-C(16)   | 80.9(5)   |
| C(3)-N(2)-C(15)-C(16)   | -86.1(5)  |
| C(1)-N(2)-C(15)-C(20)   | -105.5(5) |
| C(3)-N(2)-C(15)-C(20)   | 87.4(5)   |
| C(20)-C(15)-C(16)-C(17) | 9.5(6)    |
| N(2)-C(15)-C(16)-C(17)  | -177.2(3) |
| C(20)-C(15)-C(16)-C(21) | -164.5(4) |
| N(2)-C(15)-C(16)-C(21)  | 8.8(6)    |
| C(15)-C(16)-C(17)-C(18) | -3.9(6)   |

|                         |           |
|-------------------------|-----------|
| C(21)-C(16)-C(17)-C(18) | 170.4(4)  |
| C(16)-C(17)-C(18)-C(19) | -1.9(6)   |
| C(16)-C(17)-C(18)-N(4)  | -179.9(4) |
| C(24)-N(4)-C(18)-C(19)  | -5.5(6)   |
| C(23)-N(4)-C(18)-C(19)  | 115.0(5)  |
| C(25)-N(4)-C(18)-C(19)  | -124.0(4) |
| C(24)-N(4)-C(18)-C(17)  | 172.5(4)  |
| C(23)-N(4)-C(18)-C(17)  | -67.0(5)  |
| C(25)-N(4)-C(18)-C(17)  | 54.0(5)   |
| C(17)-C(18)-C(19)-C(20) | 2.4(6)    |
| N(4)-C(18)-C(19)-C(20)  | -179.7(4) |
| C(16)-C(15)-C(20)-C(19) | -9.0(6)   |
| N(2)-C(15)-C(20)-C(19)  | 177.6(4)  |
| C(16)-C(15)-C(20)-C(22) | 167.1(4)  |
| N(2)-C(15)-C(20)-C(22)  | -6.3(6)   |
| C(18)-C(19)-C(20)-C(15) | 3.0(6)    |
| C(18)-C(19)-C(20)-C(22) | -173.3(4) |
| C(35)-O(1)-C(26)-C(28)  | 178.7(6)  |
| Ru(1)-O(1)-C(26)-C(28)  | 4.6(10)   |
| C(35)-O(1)-C(26)-C(27)  | 72.8(7)   |
| Ru(1)-O(1)-C(26)-C(27)  | -101.3(5) |
| C(1)-Ru(1)-C(29)-C(30)  | -178.0(3) |
| O(1)-Ru(1)-C(29)-C(30)  | 0.2(3)    |
| Cl(2)-Ru(1)-C(29)-C(30) | -84.6(3)  |
| Cl(1)-Ru(1)-C(29)-C(30) | 84.3(3)   |
| Ru(1)-C(29)-C(30)-C(31) | 178.7(4)  |
| Ru(1)-C(29)-C(30)-C(35) | 0.4(6)    |
| C(35)-C(30)-C(31)-C(32) | -0.2(8)   |
| C(29)-C(30)-C(31)-C(32) | -178.5(5) |
| C(30)-C(31)-C(32)-C(33) | 0.7(10)   |
| C(31)-C(32)-C(33)-C(34) | -0.9(11)  |
| C(32)-C(33)-C(34)-C(35) | 0.5(10)   |
| C(26)-O(1)-C(35)-C(34)  | 6.7(8)    |

|                          |           |
|--------------------------|-----------|
| Ru(1)-O(1)-C(35)-C(34)   | -178.1(4) |
| C(26)-O(1)-C(35)-C(30)   | -174.1(6) |
| Ru(1)-O(1)-C(35)-C(30)   | 1.1(5)    |
| C(33)-C(34)-C(35)-O(1)   | 179.1(5)  |
| C(33)-C(34)-C(35)-C(30)  | 0.0(8)    |
| C(31)-C(30)-C(35)-O(1)   | -179.4(4) |
| C(29)-C(30)-C(35)-O(1)   | -1.0(6)   |
| C(31)-C(30)-C(35)-C(34)  | -0.1(8)   |
| C(29)-C(30)-C(35)-C(34)  | 178.2(5)  |
| O(2)-S(1)-C(36)-F(2)     | -58.1(7)  |
| O(3)-S(1)-C(36)-F(2)     | 64.9(6)   |
| O(4)-S(1)-C(36)-F(2)     | -176.8(5) |
| O(2)-S(1)-C(36)-F(1)     | 174.8(7)  |
| O(3)-S(1)-C(36)-F(1)     | -62.2(7)  |
| O(4)-S(1)-C(36)-F(1)     | 56.1(7)   |
| O(2)-S(1)-C(36)-F(3)     | 55.9(7)   |
| O(3)-S(1)-C(36)-F(3)     | 178.9(5)  |
| O(4)-S(1)-C(36)-F(3)     | -62.8(6)  |
| O(7)-S(2)-C(37)-F(6)     | -64.0(7)  |
| O(6)-S(2)-C(37)-F(6)     | 174.8(6)  |
| O(5)-S(2)-C(37)-F(6)     | 57.3(7)   |
| O(7)-S(2)-C(37)-F(4)     | -178.2(6) |
| O(6)-S(2)-C(37)-F(4)     | 60.5(6)   |
| O(5)-S(2)-C(37)-F(4)     | -57.0(7)  |
| O(7)-S(2)-C(37)-F(5)     | 58.4(7)   |
| O(6)-S(2)-C(37)-F(5)     | -62.8(6)  |
| O(5)-S(2)-C(37)-F(5)     | 179.7(5)  |
| O(7A)-S(2A)-C(37A)-F(4A) | -176(2)   |
| O(5A)-S(2A)-C(37A)-F(4A) | 52(3)     |
| O(6A)-S(2A)-C(37A)-F(4A) | -71(2)    |
| O(7A)-S(2A)-C(37A)-F(5A) | -49(3)    |
| O(5A)-S(2A)-C(37A)-F(5A) | 179(3)    |
| O(6A)-S(2A)-C(37A)-F(5A) | 56(2)     |

|                          |           |
|--------------------------|-----------|
| O(7A)-S(2A)-C(37A)-F(6A) | 66(2)     |
| O(5A)-S(2A)-C(37A)-F(6A) | -65(3)    |
| O(6A)-S(2A)-C(37A)-F(6A) | 171.8(17) |
| C(2Z)-N(1Z)-C(1Z)-O(1Z)  | 4.4(10)   |
| C(3Z)-N(1Z)-C(1Z)-O(1Z)  | -177.7(7) |

---
